# Supplementary material
Source: MDPI journal article supplement (https://www.mdpi.com/1424-8247/15/9/1142)
Supplement: s1 [file s1]

purified-katekin 2/11/2021 9:35:23 AM

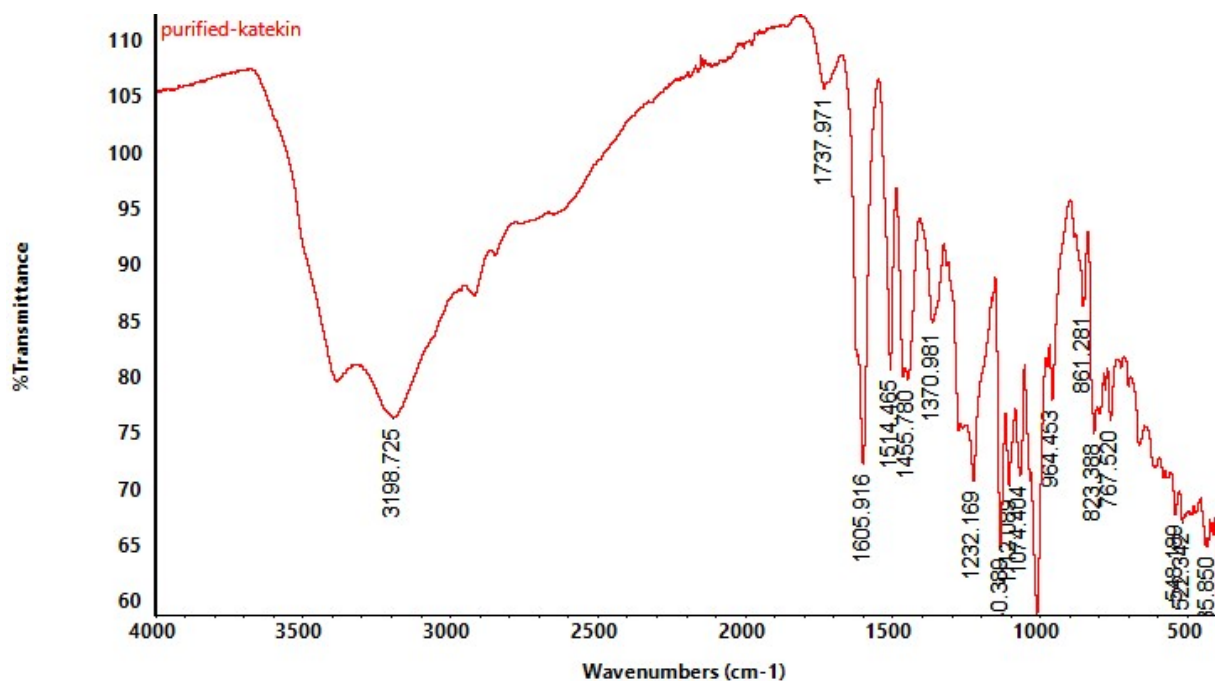

Title: purified-katekin

Number of sample scans: 16

Number of background scans: 16

Instrument Serial: BDM1910155

Smart Accy: V67654

Model: Summit

Source: IR

Detector: DTGS KBr

Smart Accessory Title: Everest ATR

Smart Accessory ID: V67654

Crystal type: : Diamond

Beamsplitter: KBr

Sample spacing: 1.0

Digitizer bits: 24

Optical velocity: 0.4747

Aperture: 100.0

Sample gain: 1.0

High pass filter: 1.0

Low pass filter: 11000.0

Comments: None
