# Supplementary material
Source: MDPI journal article supplement (https://www.mdpi.com/1424-8247/15/9/1142)
Supplement: s1 [file s1]

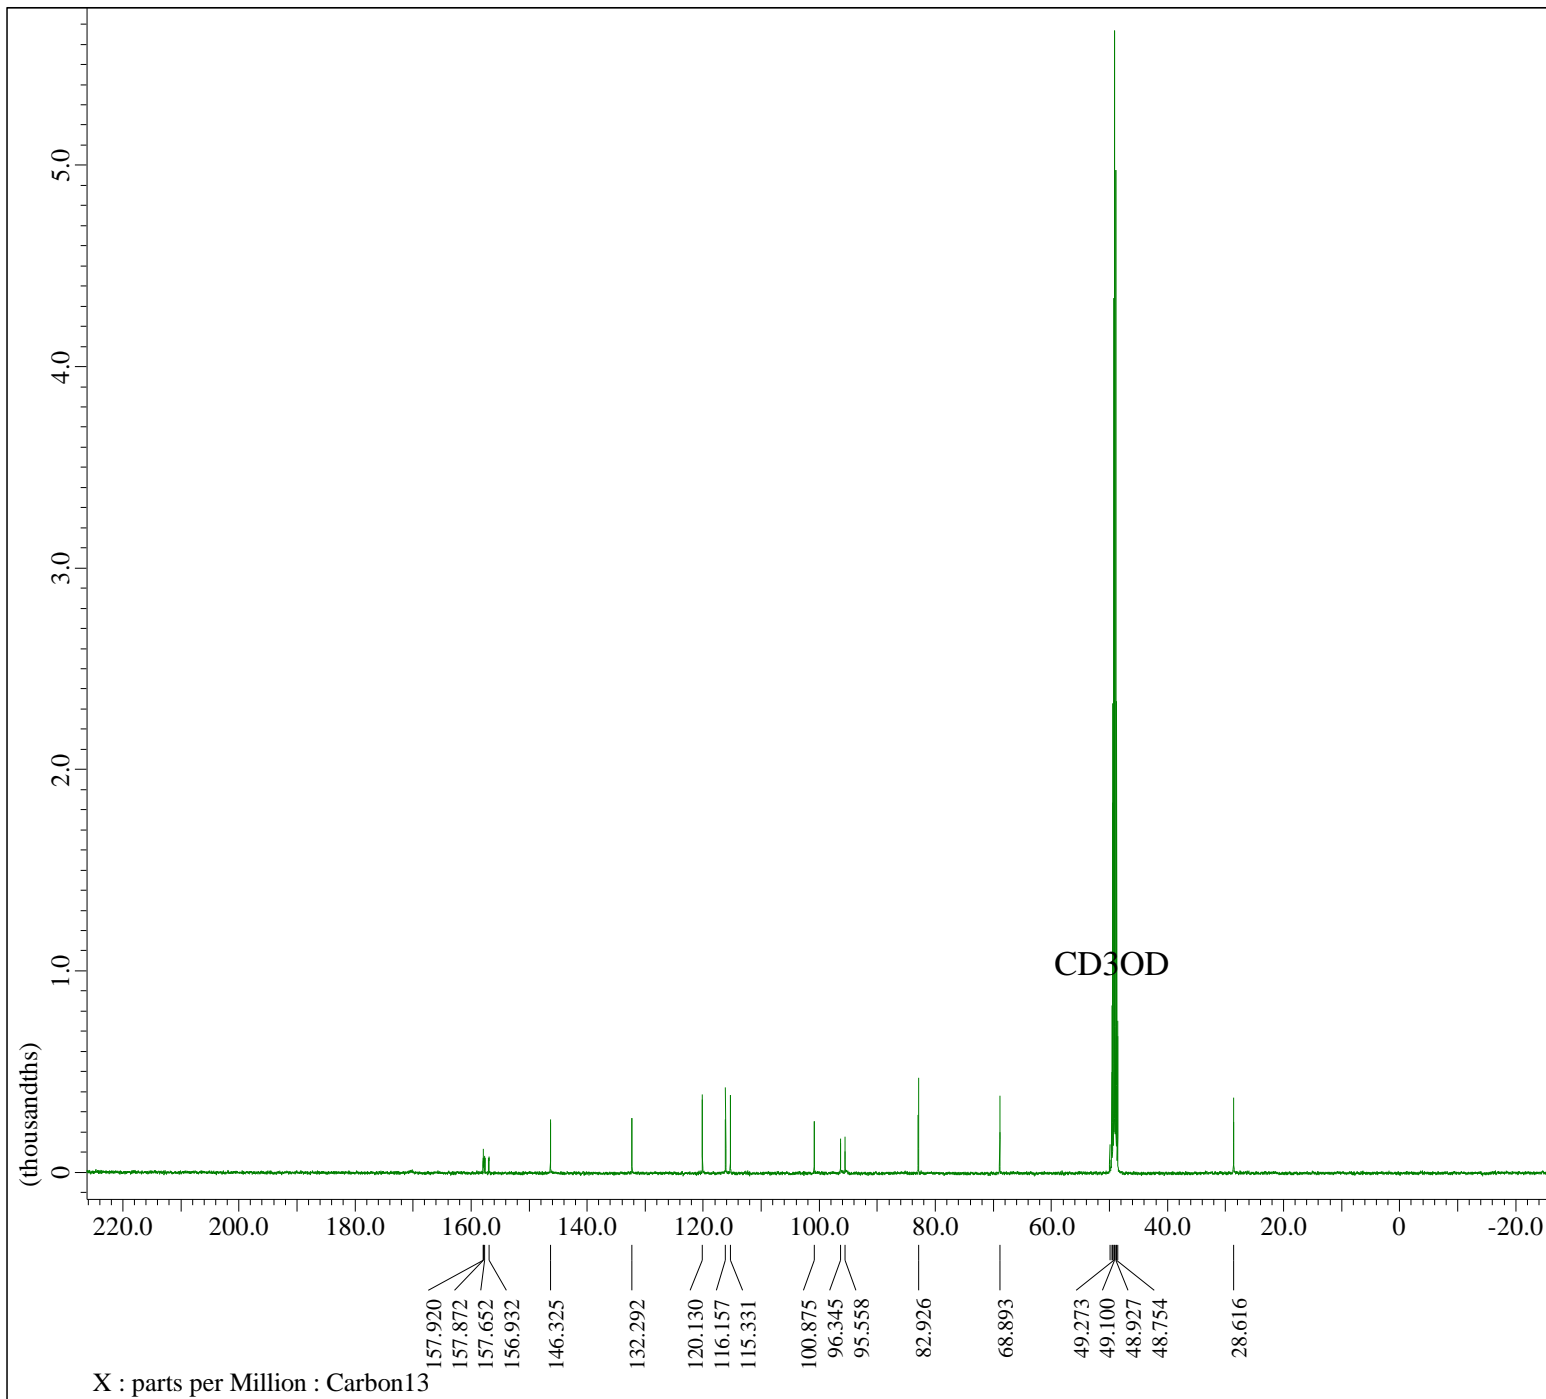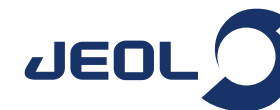

---- PROCESSING PARAMETERS ----  
sexp( 2.0[Hz], 0.0[s] )  
trapezoid( 0[%], 0[%], 80[%], 100[%] )  
zerofill( 1 )  
fft( 1, TRUE, TRUE )  
machinephase  
ppm

Derived from: SORAYA-1\_Carbon-1-1.jdf

Filename = SORAYA-1\_Carbon-1-  
Author = delta  
Experiment = carbon.jxp  
Sample\_Id = SORAYA-1  
Solvent = METHANOL-D4  
Actual\_Start\_Time = 2-JAN-2020 09:05:  
Revision\_Time = 2-JAN-2020 13:00:

Comment = single pulse decou  
Data\_Format = 1D COMPLEX  
Dim\_Size = 26214  
X\_Domain = Carbon13  
Dim\_Title = Carbon13  
Dim\_Units = [ppm]  
Dimensions = X  
Spectrometer = JNM-ECZ500R/S1

Field\_Strength = 11.7473579[T] (500  
X\_Acq\_Duration = 0.82837504[s]  
X\_Domain = Carbon13  
X\_Freq = 125.76529768[MHz]  
X\_Offset = 100[ppm]  
X\_Points = 32768  
X\_Prescans = 4  
X\_Resolution = 1.20718268[Hz]  
X\_Sweep = 39.55696203[kHz]  
X\_Sweep\_Clipped = 31.64556962[kHz]  
Irr\_Domain = Proton  
Irr\_Freq = 500.15991521[MHz]  
Irr\_Offset = 5.0[ppm]  
Blanking = 2[us]  
Clipped = FALSE  
Scans = 5000  
Total\_Scans = 5000

Relaxation\_Delay = 2[s]  
Recvr\_Gain = 36  
Temp\_Get = 18.4[dC]  
X\_90\_Width = 11.3[us]  
X\_Acq\_Time = 0.82837504[s]  
X\_Angle = 30[deg]  
X\_Atn = 11[dB]  
X\_Pulse = 3.76666667[us]  
Irr\_Atn\_Dec = 30.11[dB]  
Irr\_Atn\_Dec\_Calc = 30.11[dB]  
Irr\_Atn\_Dec\_Default\_Calc = 30.11[dB]  
Irr\_Atn\_No = 30.11[dB]  
Irr\_Dec\_Bandwidth\_Hz = 5.97826087[kHz]

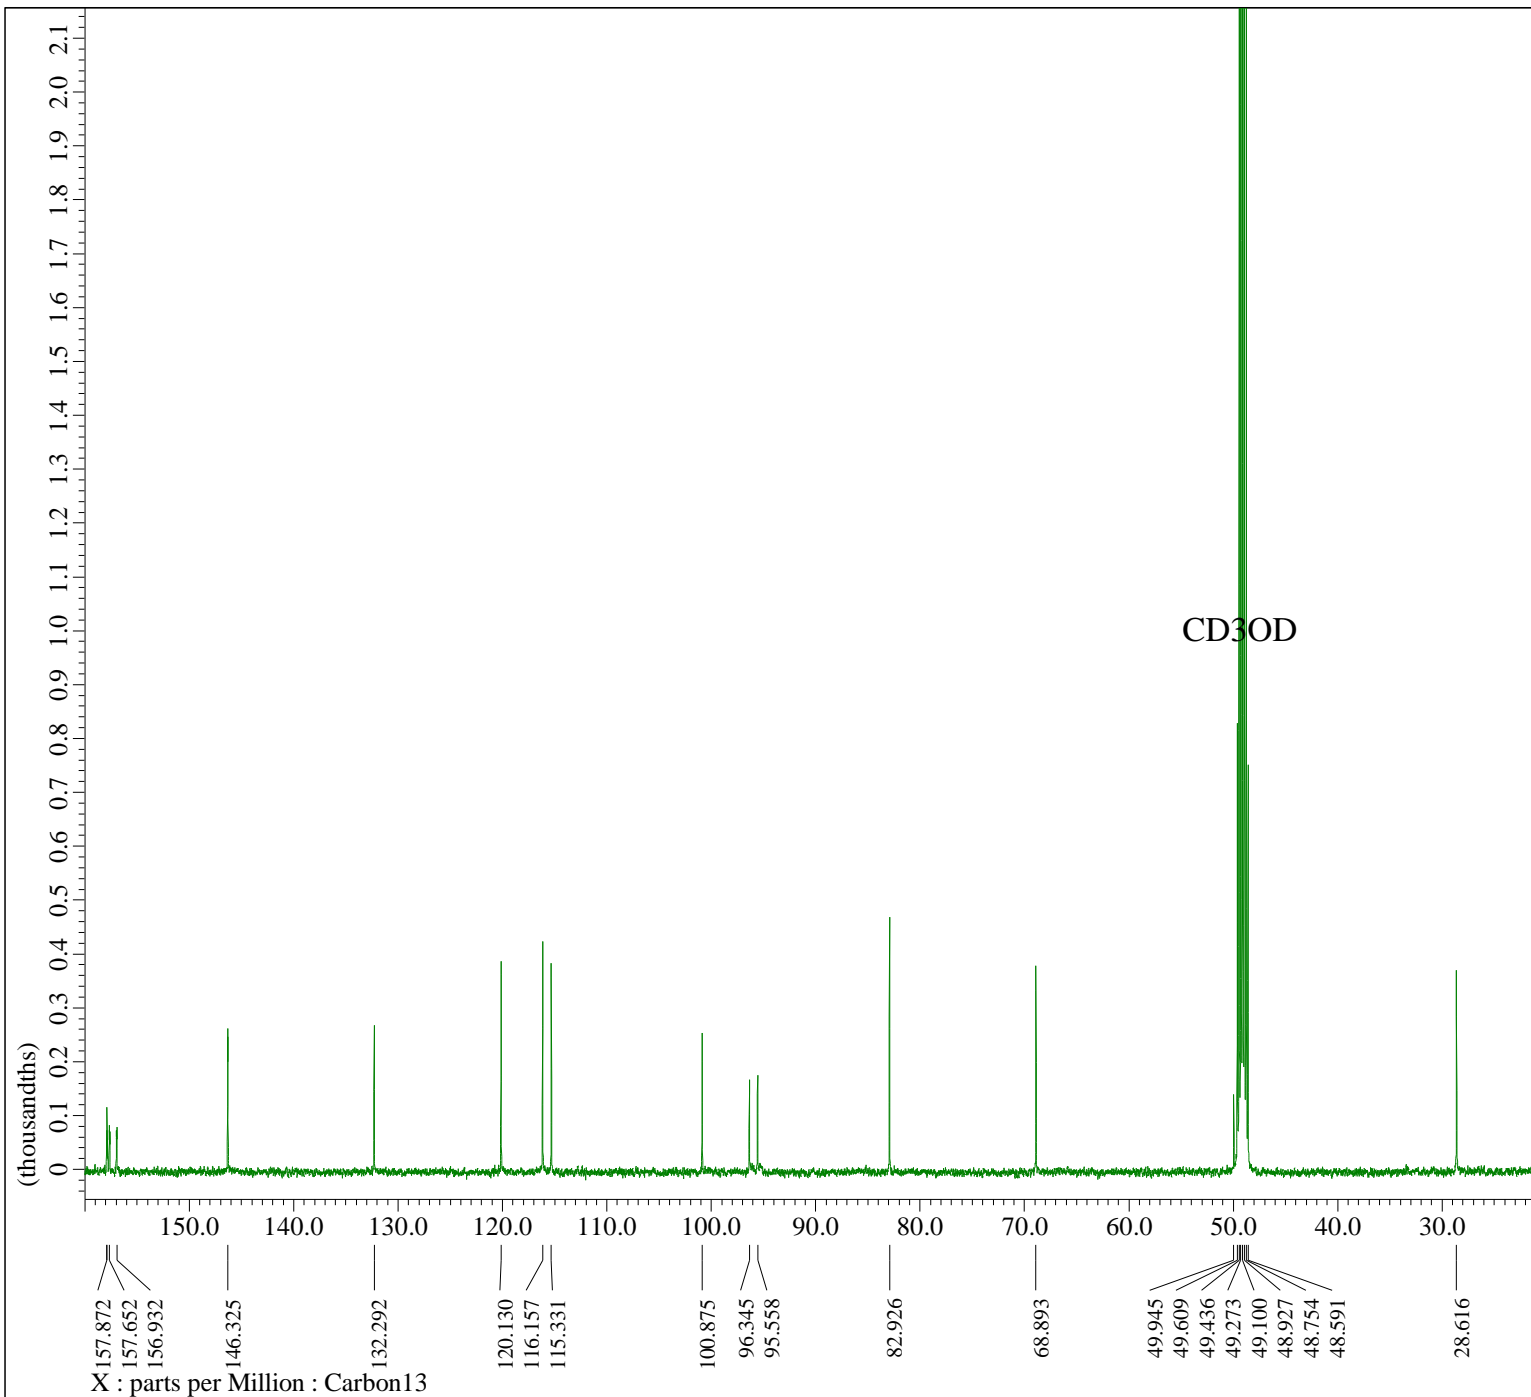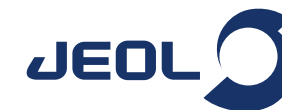

---- PROCESSING PARAMETERS ----  
sexp( 2.0[Hz], 0.0[s] )  
trapezoid( 0[%], 0[%], 80[%], 100[%] )  
zerofill( 1 )  
fft( 1, TRUE, TRUE )  
machinephase  
ppm

Derived from: SORAYA-1\_Carbon-1-1.jdf

Filename = SORAYA-1\_Carbon-1-  
Author = delta  
Experiment = carbon.jxp  
Sample\_Id = SORAYA-1  
Solvent = METHANOL-D4  
Actual\_Start\_Time = 2-JAN-2020 09:05:  
Revision\_Time = 2-JAN-2020 13:00:

Comment = single pulse decou  
Data\_Format = 1D COMPLEX  
Dim\_Size = 26214  
X\_Domain = Carbon13  
Dim\_Title = Carbon13  
Dim\_Units = [ppm]  
Dimensions = X  
Spectrometer = JNM-ECZ500R/S1

Field\_Strength = 11.7473579[T] (500  
X\_Acq\_Duration = 0.82837504[s]  
X\_Domain = Carbon13  
X\_Freq = 125.76529768[MHz]  
X\_Offset = 100[ppm]  
X\_Points = 32768  
X\_Prescans = 4  
X\_Resolution = 1.20718268[Hz]  
X\_Sweep = 39.55696203[kHz]  
X\_Sweep\_Clipped = 31.64556962[kHz]  
Irr\_Domain = Proton  
Irr\_Freq = 500.15991521[MHz]  
Irr\_Offset = 5.0[ppm]  
Blanking = 2[us]  
Clipped = FALSE  
Scans = 5000  
Total\_Scans = 5000

Relaxation\_Delay = 2[s]  
Recvr\_Gain = 36  
Temp\_Get = 18.4[dC]  
X\_90\_Width = 11.3[us]  
X\_Acq\_Time = 0.82837504[s]  
X\_Angle = 30[deg]  
X\_Atn = 11[dB]  
X\_Pulse = 3.76666667[us]  
Irr\_Atn\_Dec = 30.11[dB]  
Irr\_Atn\_Dec\_Calc = 30.11[dB]  
Irr\_Atn\_Dec\_Default\_Calc = 30.11[dB]  
Irr\_Atn\_No = 30.11[dB]  
Irr\_Dec\_Bandwidth\_Hz = 5.97826087[kHz]

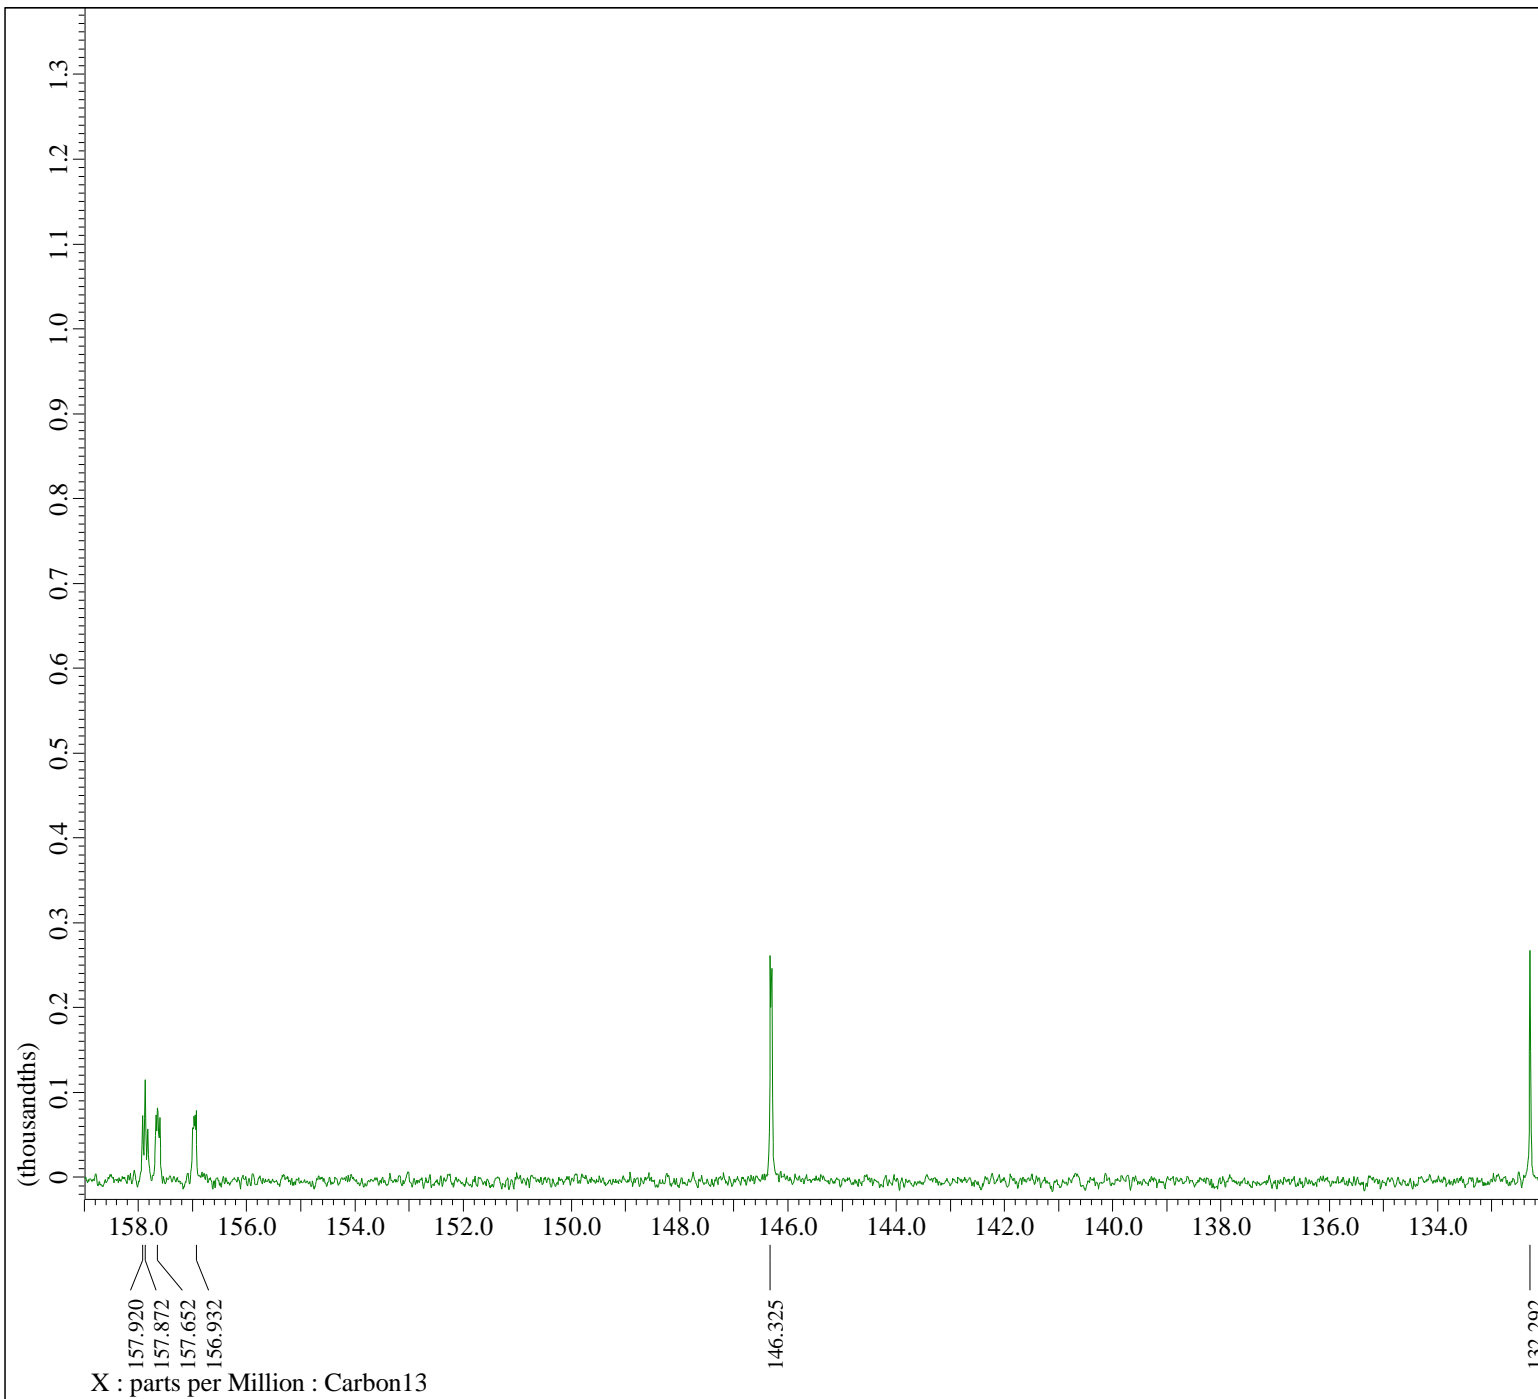

---- PROCESSING PARAMETERS ----  
sexp( 2.0[Hz], 0.0[s] )  
trapezoid( 0[%], 0[%], 80[%], 100[%] )  
zerofill( 1 )  
fft( 1, TRUE, TRUE )  
machinephase  
ppm

Derived from: SORAYA-1\_Carbon-1-1.jdf

Filename = SORAYA-1\_Carbon-1-  
Author = delta  
Experiment = carbon.jxp  
Sample\_Id = SORAYA-1  
Solvent = METHANOL-D4  
Actual\_Start\_Time = 2-JAN-2020 09:05:  
Revision\_Time = 2-JAN-2020 13:00:

Comment = single pulse decou  
Data\_Format = 1D COMPLEX  
Dim\_Size = 26214  
X\_Domain = Carbon13  
Dim\_Title = Carbon13  
Dim\_Units = [ppm]  
Dimensions = X  
Spectrometer = JNM-ECZ500R/S1

Field\_Strength = 11.7473579[T] (500  
X\_Acq\_Duration = 0.82837504[s]  
X\_Domain = Carbon13  
X\_Freq = 125.76529768[MHz]  
X\_Offset = 100[ppm]  
X\_Points = 32768  
X\_Prescans = 4  
X\_Resolution = 1.20718268[Hz]  
X\_Sweep = 39.55696203[kHz]  
X\_Sweep\_Clipped = 31.64556962[kHz]  
Irr\_Domain = Proton  
Irr\_Freq = 500.15991521[MHz]  
Irr\_Offset = 5.0[ppm]  
Blanking = 2[us]  
Clipped = FALSE  
Scans = 5000  
Total\_Scans = 5000

Relaxation\_Delay = 2[s]  
Recvr\_Gain = 36  
Temp\_Get = 18.4[dC]  
X\_90\_Width = 11.3[us]  
X\_Acq\_Time = 0.82837504[s]  
X\_Angle = 30[deg]  
X\_Atn = 11[dB]  
X\_Pulse = 3.76666667[us]  
Irr\_Atn\_Dec = 30.11[dB]  
Irr\_Atn\_Dec\_Calc = 30.11[dB]  
Irr\_Atn\_Dec\_Default\_Calc = 30.11[dB]  
Irr\_Atn\_No = 30.11[dB]  
Irr\_Dec\_Bandwidth\_Hz = 5.97826087[kHz]

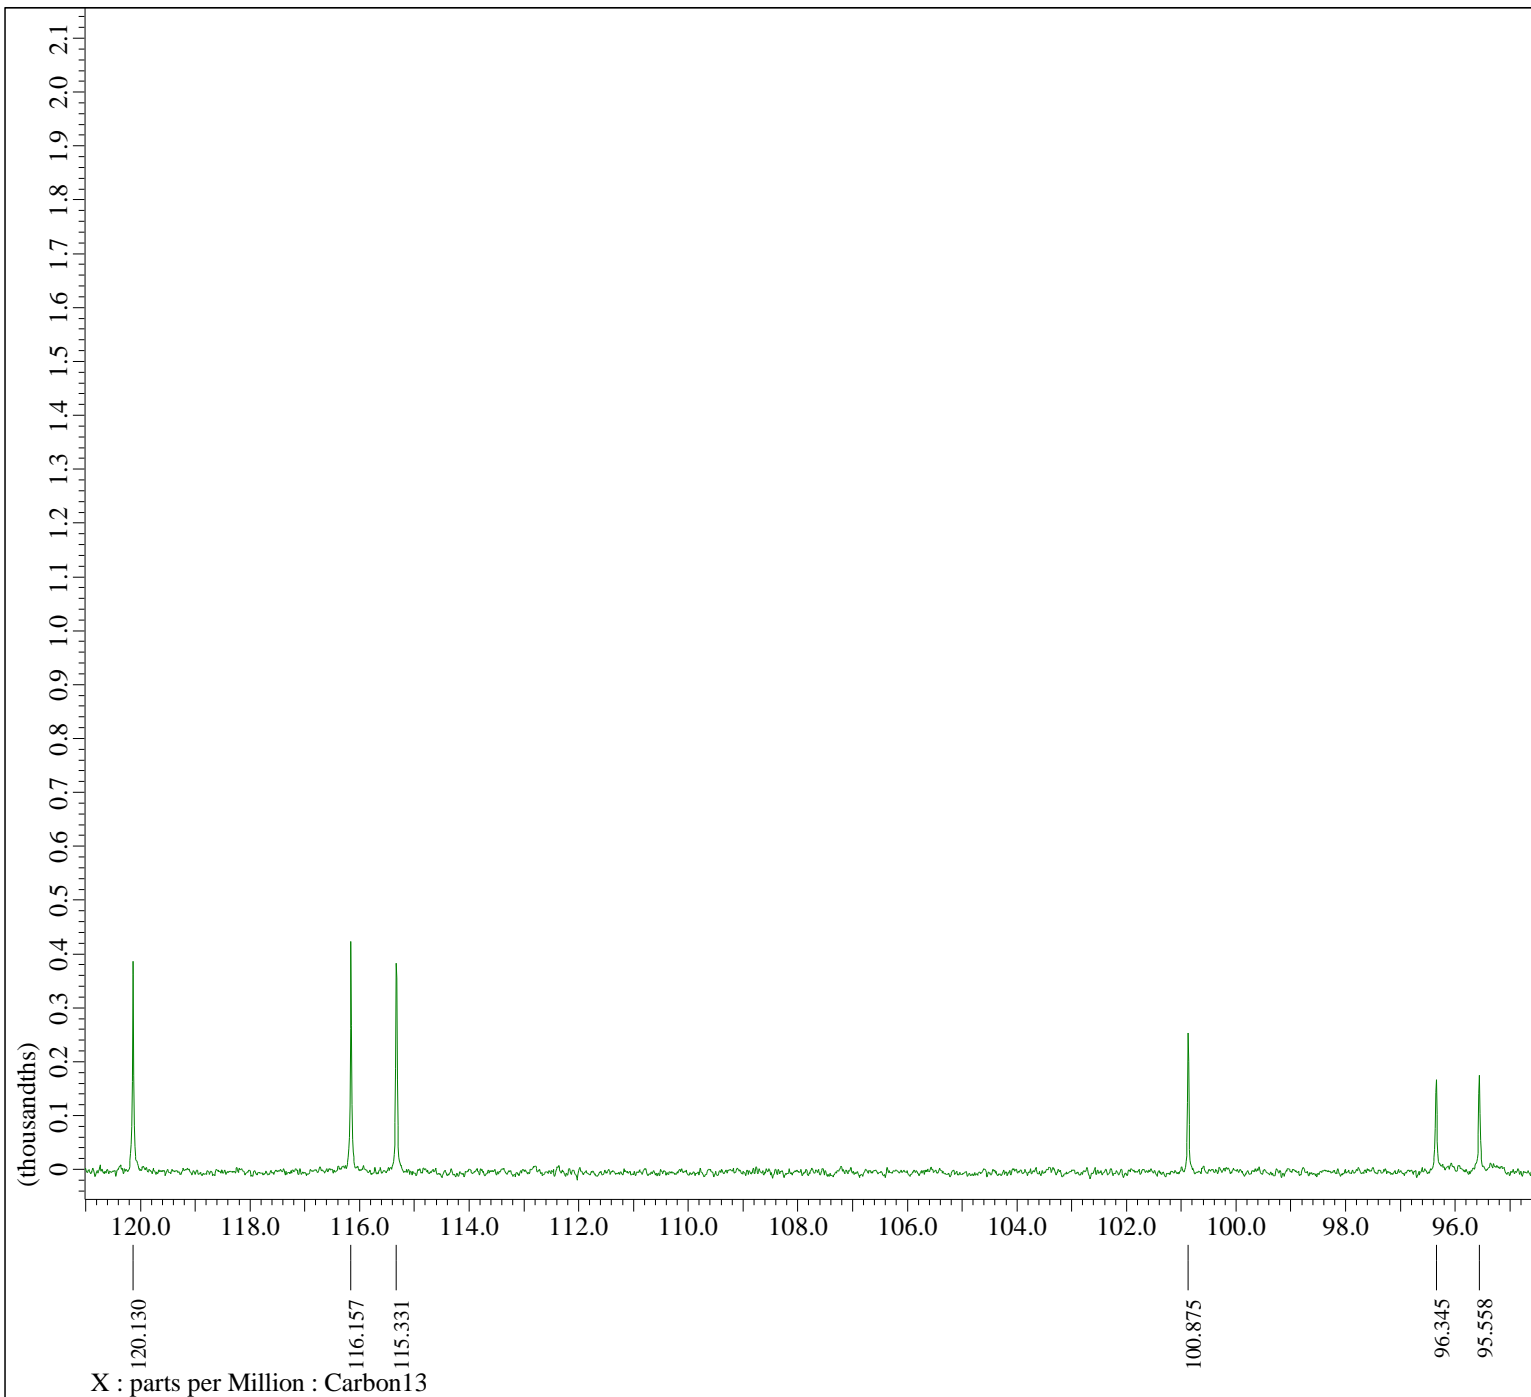

---- PROCESSING PARAMETERS ----  
sexp( 2.0[Hz], 0.0[s] )  
trapezoid( 0[%], 0[%], 80[%], 100[%] )  
zerofill( 1 )  
fft( 1, TRUE, TRUE )  
machinephase  
ppm

Derived from: SORAYA-1\_Carbon-1-1.jdf

Filename = SORAYA-1\_Carbon-1-  
Author = delta  
Experiment = carbon.jxp  
Sample\_Id = SORAYA-1  
Solvent = METHANOL-D4  
Actual\_Start\_Time = 2-JAN-2020 09:05:  
Revision\_Time = 2-JAN-2020 13:00:

Comment = single pulse decou  
Data\_Format = 1D COMPLEX  
Dim\_Size = 26214  
X\_Domain = Carbon13  
Dim\_Title = Carbon13  
Dim\_Units = [ppm]  
Dimensions = X  
Spectrometer = JNM-ECZ500R/S1

Field\_Strength = 11.7473579[T] (500  
X\_Acq\_Duration = 0.82837504[s]  
X\_Domain = Carbon13  
X\_Freq = 125.76529768[MHz]  
X\_Offset = 100[ppm]  
X\_Points = 32768  
X\_Prescans = 4  
X\_Resolution = 1.20718268[Hz]  
X\_Sweep = 39.55696203[kHz]  
X\_Sweep\_Clipped = 31.64556962[kHz]  
Irr\_Domain = Proton  
Irr\_Freq = 500.15991521[MHz]  
Irr\_Offset = 5.0[ppm]  
Blanking = 2[us]  
Clipped = FALSE  
Scans = 5000  
Total\_Scans = 5000

Relaxation\_Delay = 2[s]  
Recvr\_Gain = 36  
Temp\_Get = 18.4[dC]  
X\_90\_Width = 11.3[us]  
X\_Acq\_Time = 0.82837504[s]  
X\_Angle = 30[deg]  
X\_Atn = 11[dB]  
X\_Pulse = 3.76666667[us]  
Irr\_Atn\_Dec = 30.11[dB]  
Irr\_Atn\_Dec\_Calc = 30.11[dB]  
Irr\_Atn\_Dec\_Default\_Calc = 30.11[dB]  
Irr\_Atn\_No = 30.11[dB]  
Irr\_Dec\_Bandwidth\_Hz = 5.97826087[kHz]
