# Supplementary material
Source: MDPI journal article supplement (https://www.mdpi.com/1424-8247/15/9/1142)
Supplement: s1 [file s1]

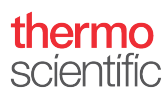

transetosome-katekin 0,5 2/11/2021 9:28:16 AM

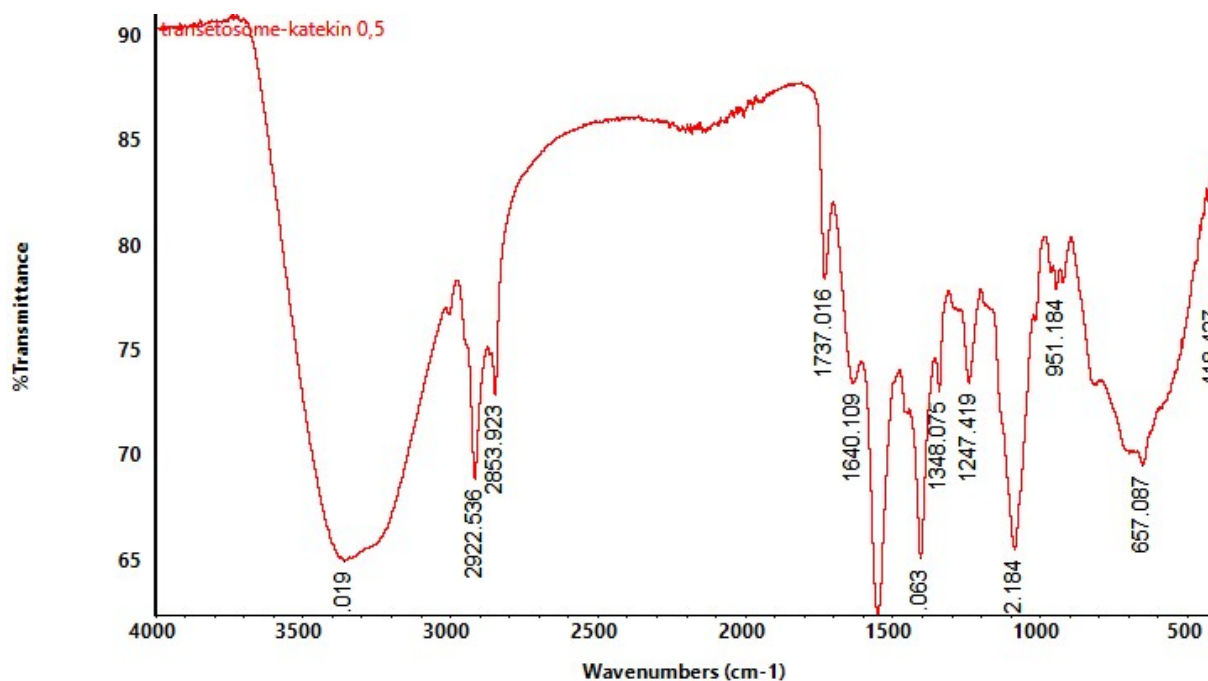

Title: transetosome-katekin 0,5  
Number of sample scans: 16  
Number of background scans: 16  
Instrument Serial: BDM1910155  
Smart Accy: V67654  
Model: Summit  
Source: IR  
Detector: DTGS KBr  
Smart Accessory Title: Everest ATR  
Smart Accessory ID: V67654  
Crystal type: : Diamond  
Beamsplitter: KBr  
Sample spacing: 1.0  
Digitizer bits: 24  
Optical velocity: 0.4747  
Aperture: 100.0  
Sample gain: 1.0  
High pass filter: 1.0  
Low pass filter: 11000.0  
Comments: None
