# Supplementary material
Source: MDPI journal article supplement (https://www.mdpi.com/1424-8247/15/9/1142)
Supplement: s1 [file s1]

## F2 Katekin 1% 4179.nsz

### Measurement Results

Date : Senin, 01 Februari 2021 14.03.07  
Measurement Type : Particle Size  
Sample Name : F2 Katekin 1%  
Scattering Angle : 90  
Temperature of the Holder : 25.0 deg. C  
Dispersion Medium Viscosity : 0.896 mPa.s  
Transmission Intensity before Meas. : 28320  
Measurement Gate Time : ---  
Distribution Form : [Standard]  
Distribution Form(Dispersity) : Polydisperse  
Representation of Result : Scattering Light Intensity  
Count Rate : 1382 kCPS

### Calculation Results

| Peak No. | S.P.Area Ratio | Mean     | S. D.   | Mode     |
|----------|----------------|----------|---------|----------|
| 1        | 1.00           | 177.2 nm | 62.7 nm | 143.0 nm |
| 2        | ---            | --- nm   | --- nm  | --- nm   |
| 3        | ---            | --- nm   | --- nm  | --- nm   |
| Total    | 1.00           | 177.2 nm | 62.7 nm | 143.0 nm |

### Histogram Operations

Size (Median) : 162.3 nm  
% Cumulative (2) : 10.0 (%) - 110.4 (nm)  
% Cumulative (4) : 30.0 (%) - 135.8 (nm)  
% Cumulative (6) : 50.0 (%) - 162.3 (nm)  
% Cumulative (8) : 70.0 (%) - 198.3 (nm)  
Mean : 177.2 nm

### Cumulant Operations

Z-Average : 163.6 nm  
PI : 0.239

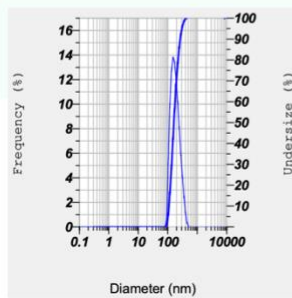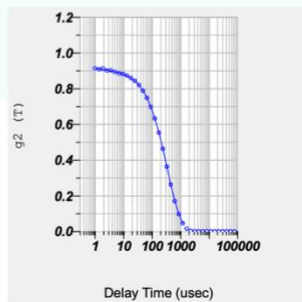

## F2 Katekin 1%\_4284.nsz

### Measurement Results

Date : Selasa, 09 Februari 2021 11.51.53  
Measurement Type : Particle Size  
Sample Name : F2 Katekin 1%  
Scattering Angle : 90  
Temperature of the Holder : 25.0 deg. C  
Dispersion Medium Viscosity : 0.895 mPa.s  
Transmission Intensity before Meas. : 28283  
Measurement Gate Time : ---  
Distribution Form : [Standard]  
Distribution Form(Dispersity) : Monodisperse  
Representation of Result : Scattering Light Intensity  
Count Rate : 1701 kCPS

### Calculation Results

| Peak No. | S.P.Area Ratio | Mean     | S. D.   | Mode     |
|----------|----------------|----------|---------|----------|
| 1        | 1.00           | 165.3 nm | 39.5 nm | 160.5 nm |
| 2        | ---            | --- nm   | --- nm  | --- nm   |
| 3        | ---            | --- nm   | --- nm  | --- nm   |
| Total    | 1.00           | 165.3 nm | 39.5 nm | 160.5 nm |

### Histogram Operations

Size (Median) : 159.8 nm  
% Cumulative (2) : 10.0 (%) - 118.0 (nm)  
% Cumulative (4) : 30.0 (%) - 139.4 (nm)  
% Cumulative (6) : 50.0 (%) - 159.8 (nm)  
% Cumulative (8) : 70.0 (%) - 184.0 (nm)  
Mean : 165.3 nm

### Cumulant Operations

Z-Average : 166.5 nm  
PI : 0.025

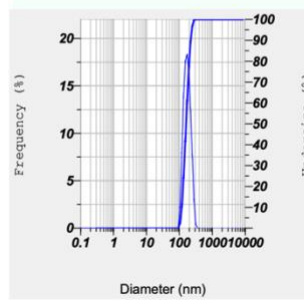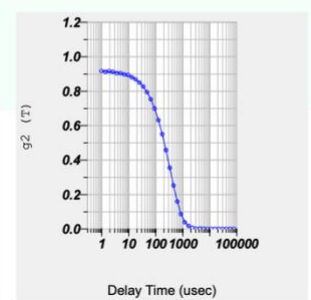

## Tranetosom Katekin 1%\_4487.nsz

### Measurement Results

Date : Senin, 22 Februari 2021 15.24.36  
Measurement Type : Particle Size  
Sample Name : Tranetosom Katekin 1%  
Scattering Angle : 90  
Temperature of the Holder : 25.0 deg. C  
Dispersion Medium Viscosity : 0.895 mPa.s  
Transmission Intensity before Meas. : 27646  
Measurement Gate Time : ---  
Distribution Form : [Standard]  
Distribution Form(Dispersity) : Polydisperse  
Representation of Result : Scattering Light Intensity  
Count Rate : 1527 kCPS

### Calculation Results

| Peak No. | S.P.Area Ratio | Mean     | S. D.   | Mode     |
|----------|----------------|----------|---------|----------|
| 1        | 1.00           | 185.8 nm | 70.3 nm | 160.6 nm |
| 2        | ---            | --- nm   | --- nm  | --- nm   |
| 3        | ---            | --- nm   | --- nm  | --- nm   |
| Total    | 1.00           | 185.8 nm | 70.3 nm | 160.6 nm |

### Histogram Operations

Size (Median) : 169.3 nm  
% Cumulative (2) : 10.0 (%) - 109.8 (nm)  
% Cumulative (4) : 30.0 (%) - 138.7 (nm)  
% Cumulative (6) : 50.0 (%) - 169.3 (nm)  
% Cumulative (8) : 70.0 (%) - 211.1 (nm)  
Mean : 185.8 nm

### Cumulant Operations

Z-Average : 166.2 nm  
PI : 0.076

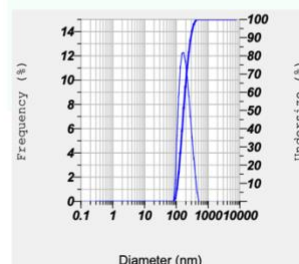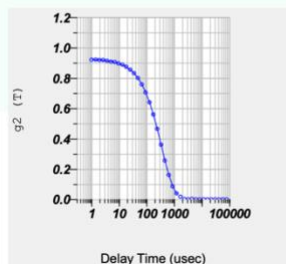

PSA and PDI of Catechin Tranethisime 1%

## F2 Katekin 1%\_4191.nzt

### Measurement Results

Date : Senin, 01 Februari 2021 15.56.41  
 Measurement Type : Zeta Potential  
 Sample Name : F2 Katekin 1%  
 Dispersion Medium Information :  
 Temperature of the Holder : 24.9 deg. C  
 Dispersion Medium Viscosity : 0.897 mPa.s  
 Conductivity : 0.192 mS/cm  
 Electrode Voltage : 3.3 V

### Calculation Results

| Peak No. | Zeta Potential | Electrophoretic Mobility      |
|----------|----------------|-------------------------------|
| 1        | -8.8 mV        | -0.000068 cm <sup>2</sup> /Vs |
| 2        | -- mV          | -- cm <sup>2</sup> /Vs        |
| 3        | -- mV          | -- cm <sup>2</sup> /Vs        |

Zeta Potential (Mean) : -8.8 mV

Electrophoretic Mobility Mean : -0.000068 cm<sup>2</sup>/Vs

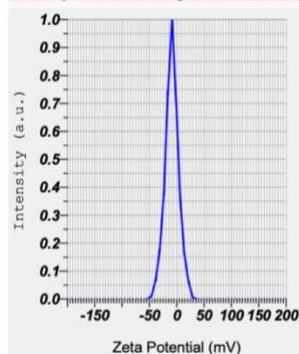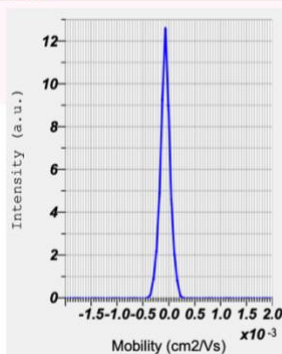

## Transetosom Katekin 1%\_4496.nzt

### Measurement Results

Date : Senin, 22 Februari 2021 16.28.15  
 Measurement Type : Zeta Potential  
 Sample Name : Transetosom Katekin 1%  
 Dispersion Medium Information :  
 Temperature of the Holder : 25.0 deg. C  
 Dispersion Medium Viscosity : 0.895 mPa.s  
 Conductivity : 0.197 mS/cm  
 Electrode Voltage : 3.3 V

### Calculation Results

| Peak No. | Zeta Potential | Electrophoretic Mobility      |
|----------|----------------|-------------------------------|
| 1        | -8.3 mV        | -0.000064 cm <sup>2</sup> /Vs |
| 2        | -- mV          | -- cm <sup>2</sup> /Vs        |
| 3        | -- mV          | -- cm <sup>2</sup> /Vs        |

Zeta Potential (Mean) : -8.3 mV

Electrophoretic Mobility Mean : -0.000064 cm<sup>2</sup>/Vs

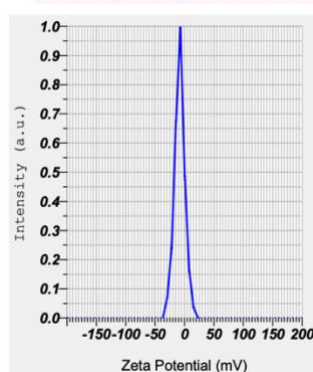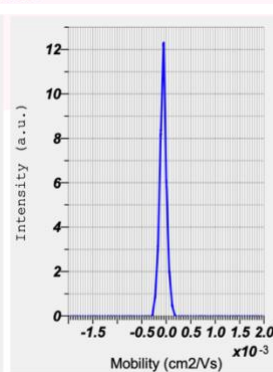

## F2 Katekin 1%\_4308.nzt

### Measurement Results

Date : Selasa, 09 Februari 2021 14.12.16  
 Measurement Type : Zeta Potential  
 Sample Name : F2 Katekin 1%  
 Dispersion Medium Information :  
 Temperature of the Holder : 25.0 deg. C  
 Dispersion Medium Viscosity : 0.895 mPa.s  
 Conductivity : 0.193 mS/cm  
 Electrode Voltage : 3.3 V

### Calculation Results

| Peak No. | Zeta Potential | Electrophoretic Mobility      |
|----------|----------------|-------------------------------|
| 1        | -17.7 mV       | -0.000137 cm <sup>2</sup> /Vs |
| 2        | -- mV          | -- cm <sup>2</sup> /Vs        |
| 3        | -- mV          | -- cm <sup>2</sup> /Vs        |

Zeta Potential (Mean) : -17.7 mV

Electrophoretic Mobility Mean : -0.000137 cm<sup>2</sup>/Vs

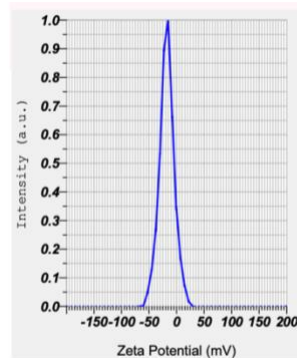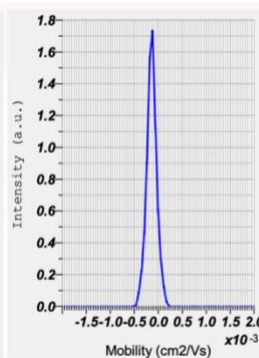

## Zeta Potential of Catechin Transethosome 1%
