# Supplementary material
Source: MDPI journal article supplement (https://www.mdpi.com/1424-8247/15/9/1142)
Supplement: s1 [file s1]

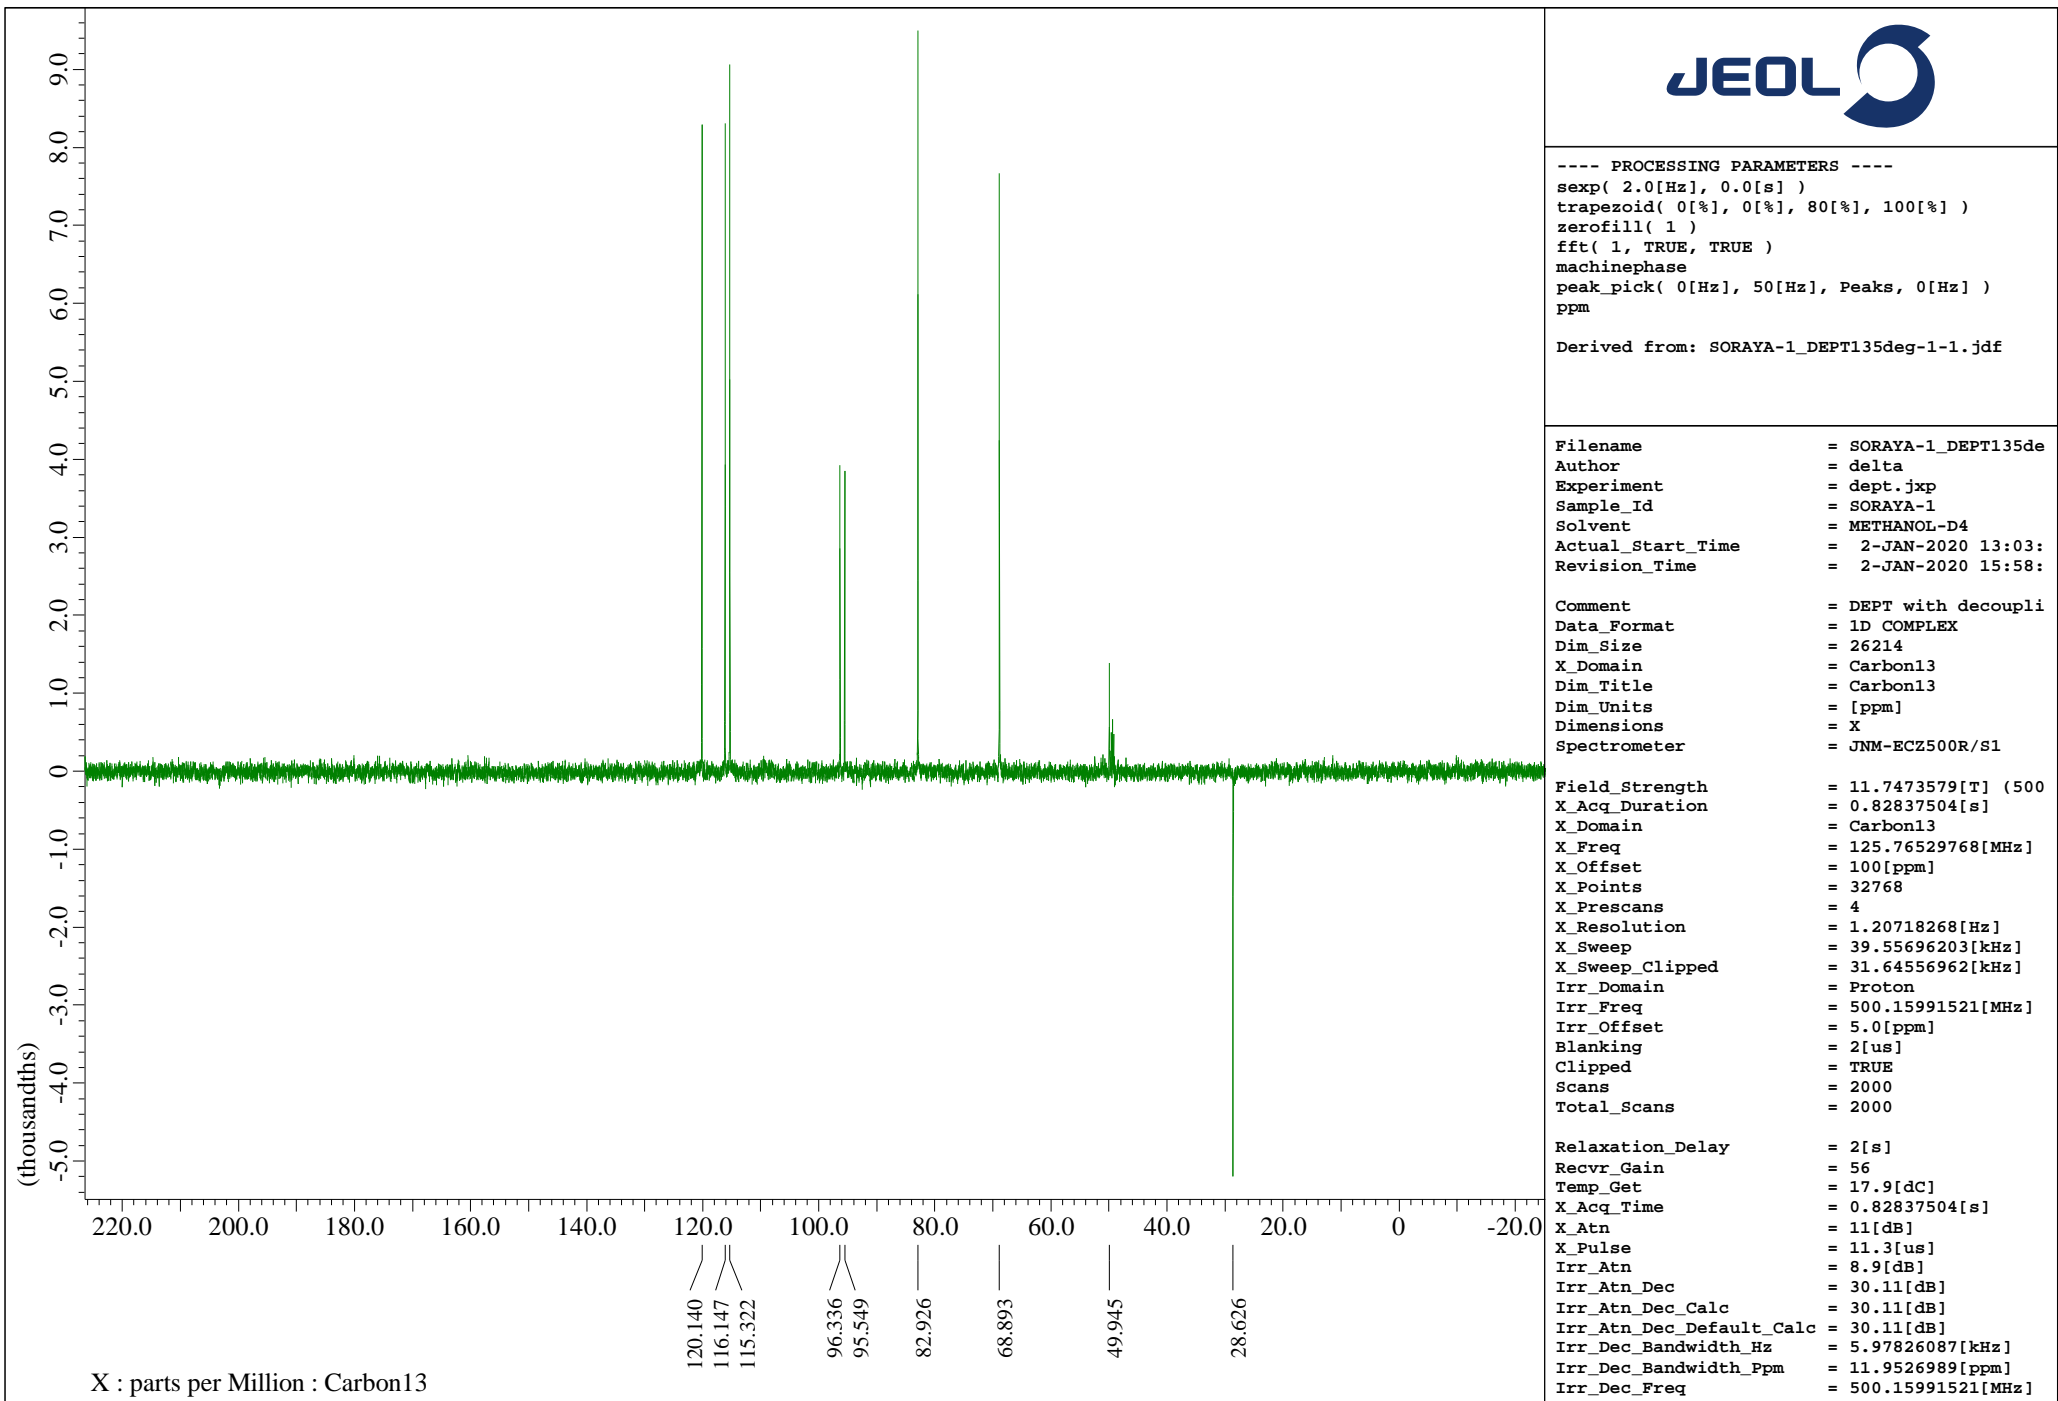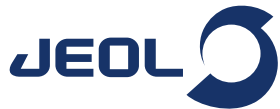

----- PROCESSING PARAMETERS -----  
sexp( 2.0[Hz], 0.0[s] )  
trapezoid( 0[%], 0[%], 80[%], 100[%] )  
zerofill( 1 )  
fft( 1, TRUE, TRUE )  
machinephase  
peak\_pick( 0[Hz], 50[Hz], Peaks, 0[Hz] )  
ppm  
  
Derived from: SORAYA-1\_DEPT135deg-1-1.jdf

|                          |                      |
|--------------------------|----------------------|
| Filename                 | = SORAYA-1_DEPT135de |
| Author                   | = delta              |
| Experiment               | = dept.jxp           |
| Sample_Id                | = SORAYA-1           |
| Solvent                  | = METHANOL-D4        |
| Actual_Start_Time        | = 2-JAN-2020 13:03:  |
| Revision_Time            | = 2-JAN-2020 15:58:  |
| Comment                  | = DEPT with decoupli |
| Data_Format              | = 1D COMPLEX         |
| Dim_Size                 | = 26214              |
| X_Domain                 | = Carbon13           |
| Dim_Title                | = Carbon13           |
| Dim_Units                | = [ppm]              |
| Dimensions               | = X                  |
| Spectrometer             | = JNM-ECZ500R/S1     |
| Field_Strength           | = 11.7473579[T] (500 |
| X_Acq_Duration           | = 0.82837504[s]      |
| X_Domain                 | = Carbon13           |
| X_Freq                   | = 125.76529768[MHz]  |
| X_Offset                 | = 100[ppm]           |
| X_Points                 | = 32768              |
| X_Prescans               | = 4                  |
| X_Resolution             | = 1.20718268[Hz]     |
| X_Sweep                  | = 39.55696203[kHz]   |
| X_Sweep_Clipped          | = 31.64556962[kHz]   |
| Irr_Domain               | = Proton             |
| Irr_Freq                 | = 500.15991521[MHz]  |
| Irr_Offset               | = 5.0[ppm]           |
| Blanking                 | = 2[us]              |
| Clipped                  | = TRUE               |
| Scans                    | = 2000               |
| Total_Scans              | = 2000               |
| Relaxation_Delay         | = 2[s]               |
| Recvr_Gain               | = 56                 |
| Temp_Get                 | = 17.9[dC]           |
| X_Acq_Time               | = 0.82837504[s]      |
| X_Atn                    | = 11[dB]             |
| X_Pulse                  | = 11.3[us]           |
| Irr_Atn                  | = 8.9[dB]            |
| Irr_Atn_Dec              | = 30.11[dB]          |
| Irr_Atn_Dec_Calc         | = 30.11[dB]          |
| Irr_Atn_Dec_Default_Calc | = 30.11[dB]          |
| Irr_Dec_Bandwidth_Hz     | = 5.97826087[kHz]    |
| Irr_Dec_Bandwidth_Ppm    | = 11.9526989[ppm]    |
| Irr_Dec_Freq             | = 500.15991521[MHz]  |

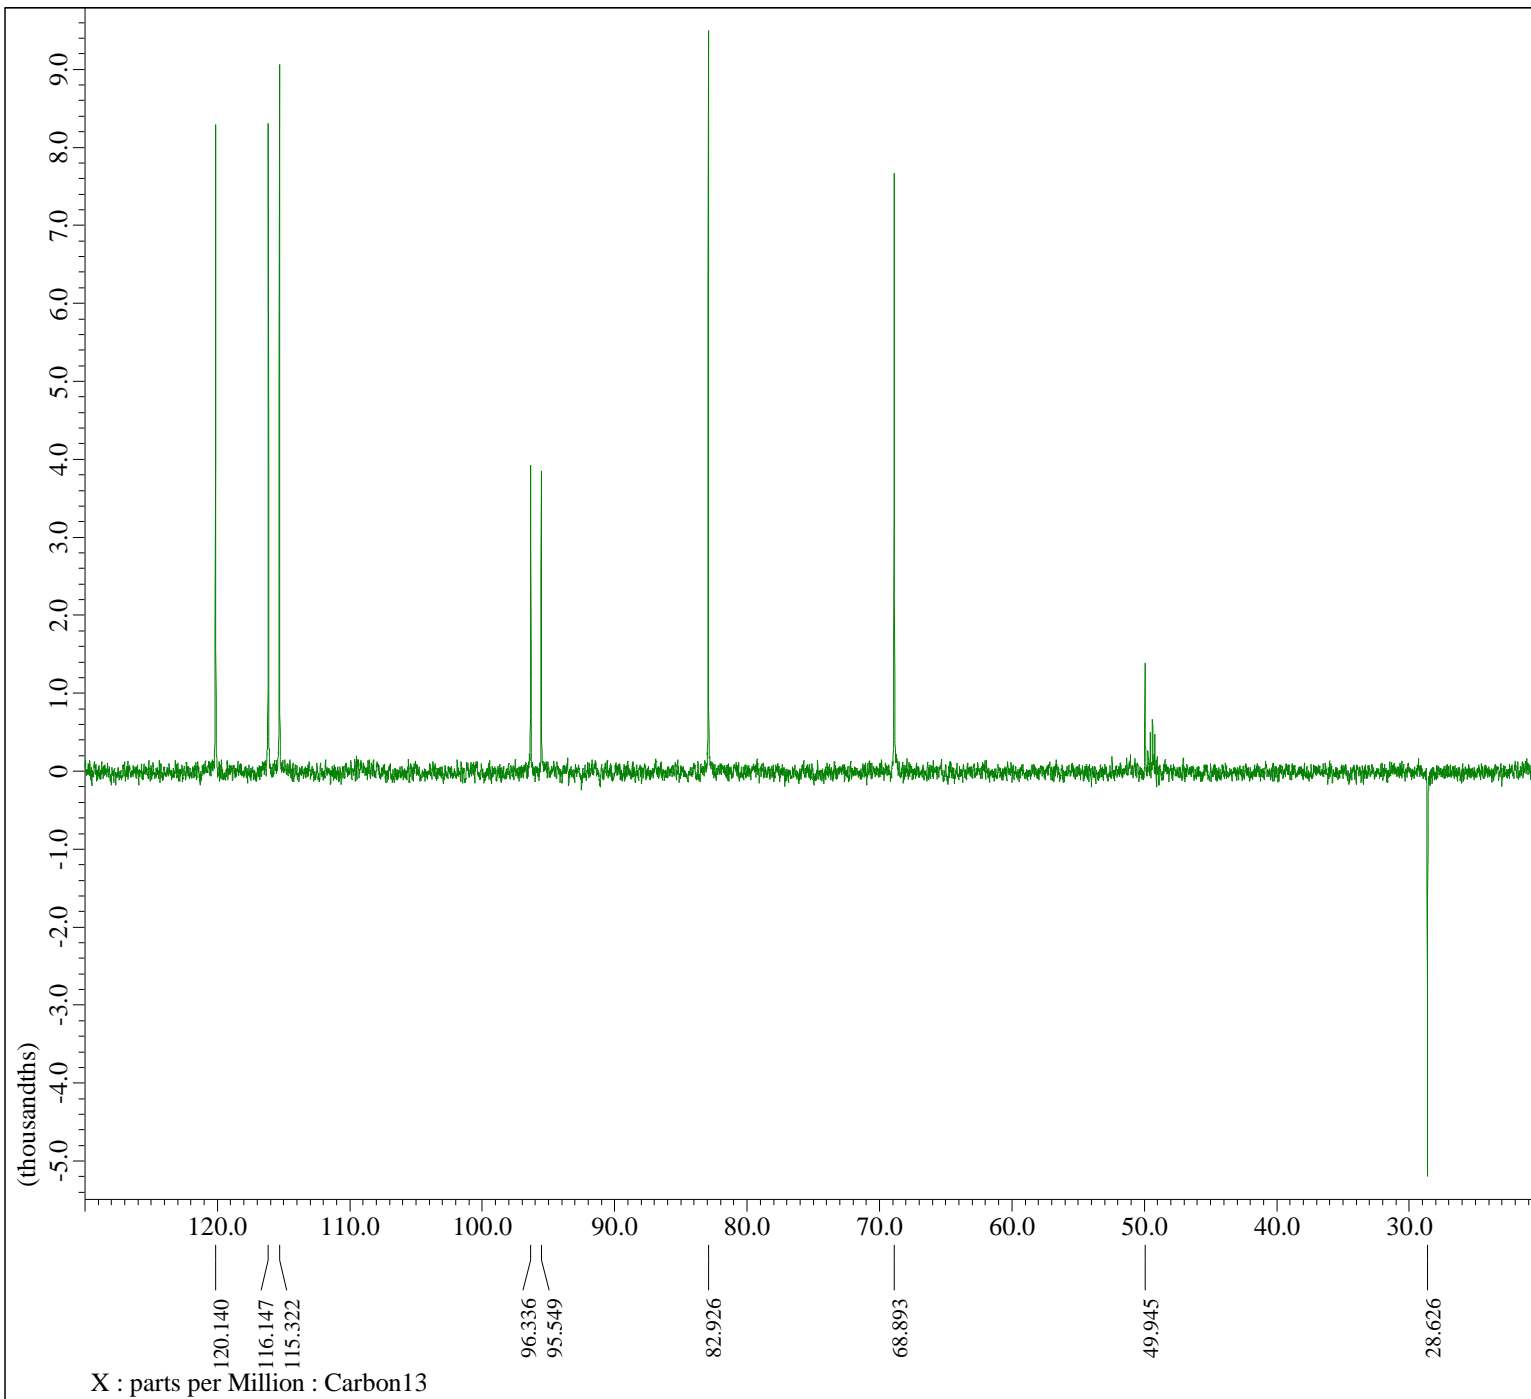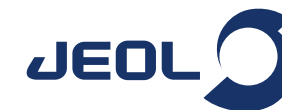

---- PROCESSING PARAMETERS ----  
sexp( 2.0[Hz], 0.0[s] )  
trapezoid( 0[%], 0[%], 80[%], 100[%] )  
zerofill( 1 )  
fft( 1, TRUE, TRUE )  
machinephase  
peak\_pick( 0[Hz], 50[Hz], Peaks, 0[Hz] )  
ppm

Derived from: SORAYA-1\_DEPT135deg-1-1.jdf

Filename = SORAYA-1\_DEPT135de  
Author = delta  
Experiment = dept.jxp  
Sample\_Id = SORAYA-1  
Solvent = METHANOL-D4  
Actual\_Start\_Time = 2-JAN-2020 13:03:  
Revision\_Time = 2-JAN-2020 15:58:

Comment = DEPT with decoupli  
Data\_Format = 1D COMPLEX  
Dim\_Size = 26214  
X\_Domain = Carbon13  
Dim\_Title = Carbon13  
Dim\_Units = [ppm]  
Dimensions = X  
Spectrometer = JNM-ECZ500R/S1

Field\_Strength = 11.7473579[T] (500  
X\_Acq\_Duration = 0.82837504[s]  
X\_Domain = Carbon13  
X\_Freq = 125.76529768[MHz]  
X\_Offset = 100[ppm]  
X\_Points = 32768  
X\_Prescans = 4  
X\_Resolution = 1.20718268[Hz]  
X\_Sweep = 39.55696203[kHz]  
X\_Sweep\_Clippped = 31.64556962[kHz]  
Irr\_Domain = Proton  
Irr\_Freq = 500.15991521[MHz]  
Irr\_Offset = 5.0[ppm]  
Blanking = 2[us]  
Clipped = TRUE  
Scans = 2000  
Total\_Scans = 2000

Relaxation\_Delay = 2[s]  
Recvr\_Gain = 56  
Temp\_Get = 17.9[dC]  
X\_Acq\_Time = 0.82837504[s]  
X\_Atn = 11[dB]  
X\_Pulse = 11.3[us]  
Irr\_Atn = 8.9[dB]  
Irr\_Atn\_Dec = 30.11[dB]  
Irr\_Atn\_Dec\_Calc = 30.11[dB]  
Irr\_Atn\_Dec\_Default\_Calc = 30.11[dB]  
Irr\_Dec\_Bandwidth\_Hz = 5.97826087[kHz]  
Irr\_Dec\_Bandwidth\_Ppm = 11.9526989[ppm]  
Irr\_Dec\_Freq = 500.15991521[MHz]
