# Supplementary material
Source: MDPI journal article supplement (https://www.mdpi.com/1424-8247/15/9/1142)

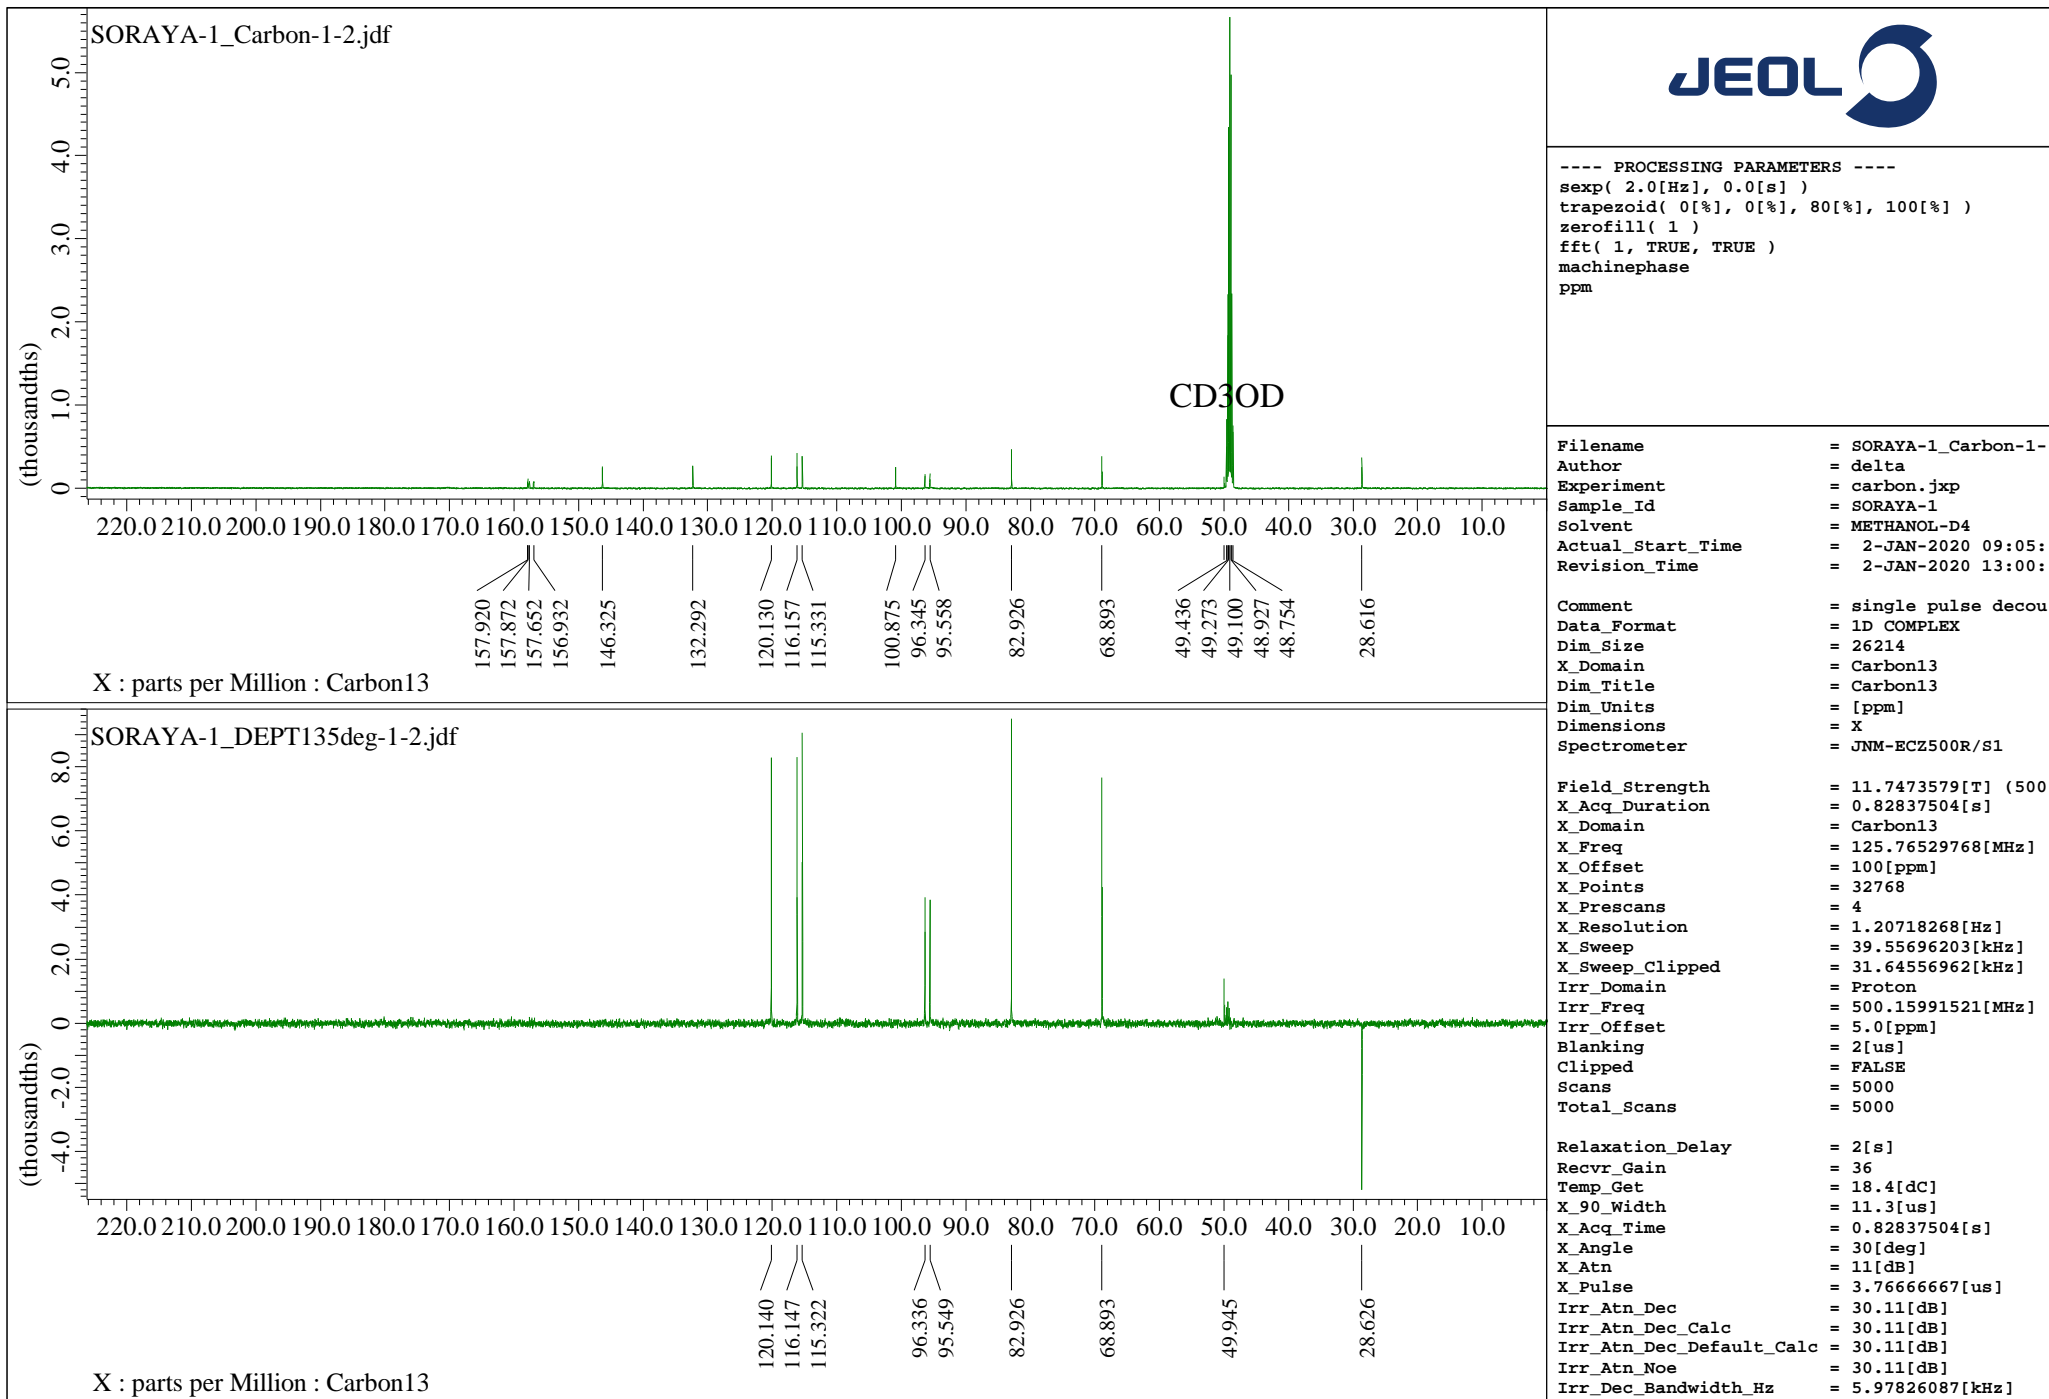

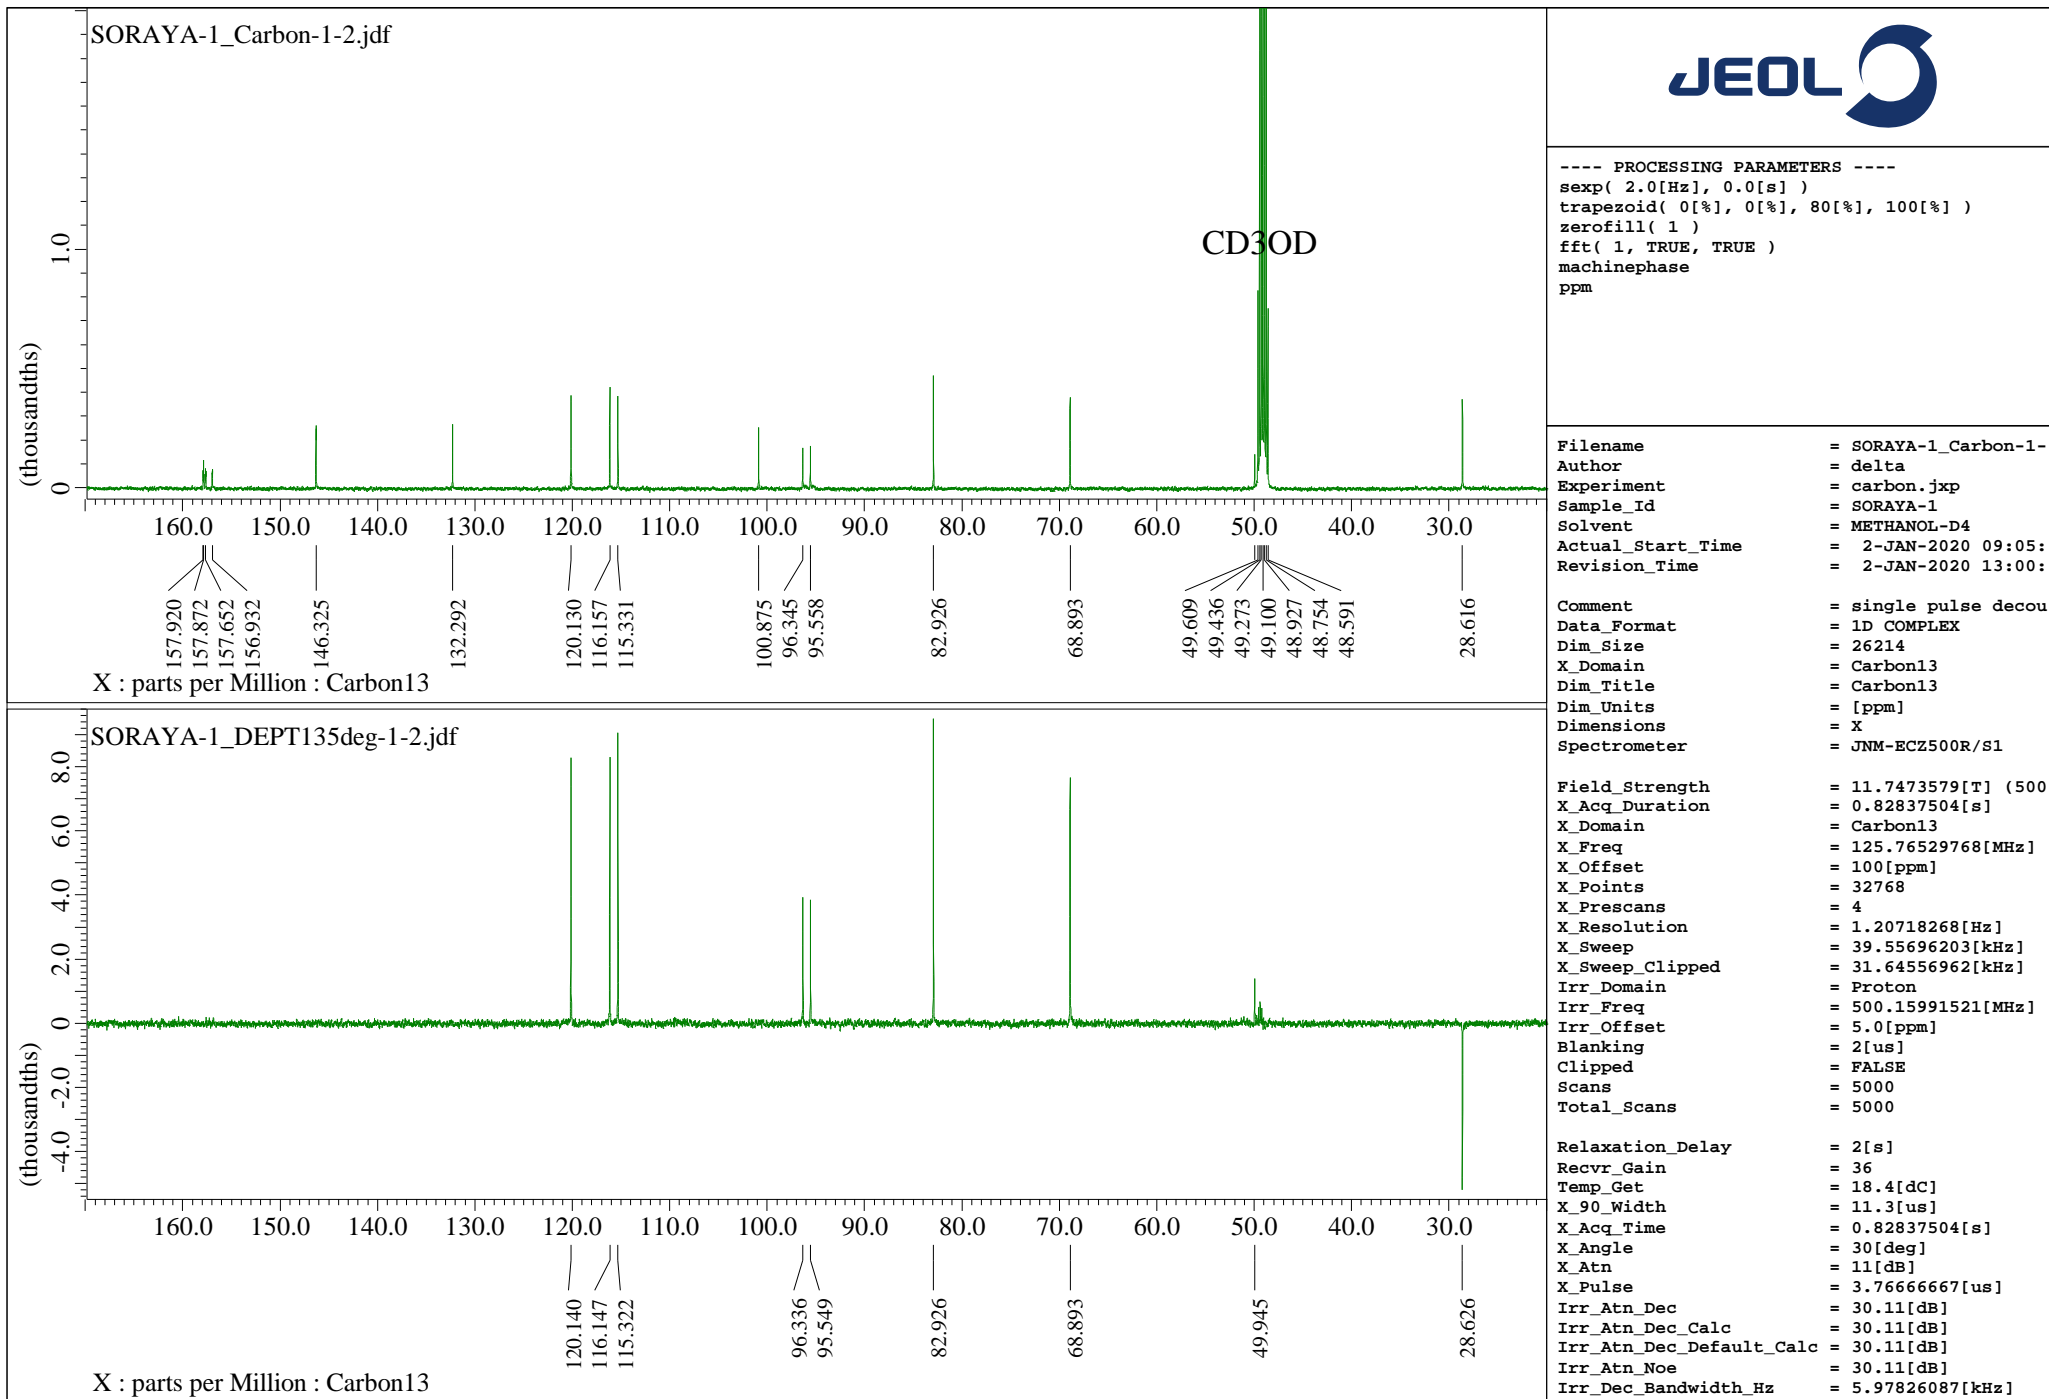

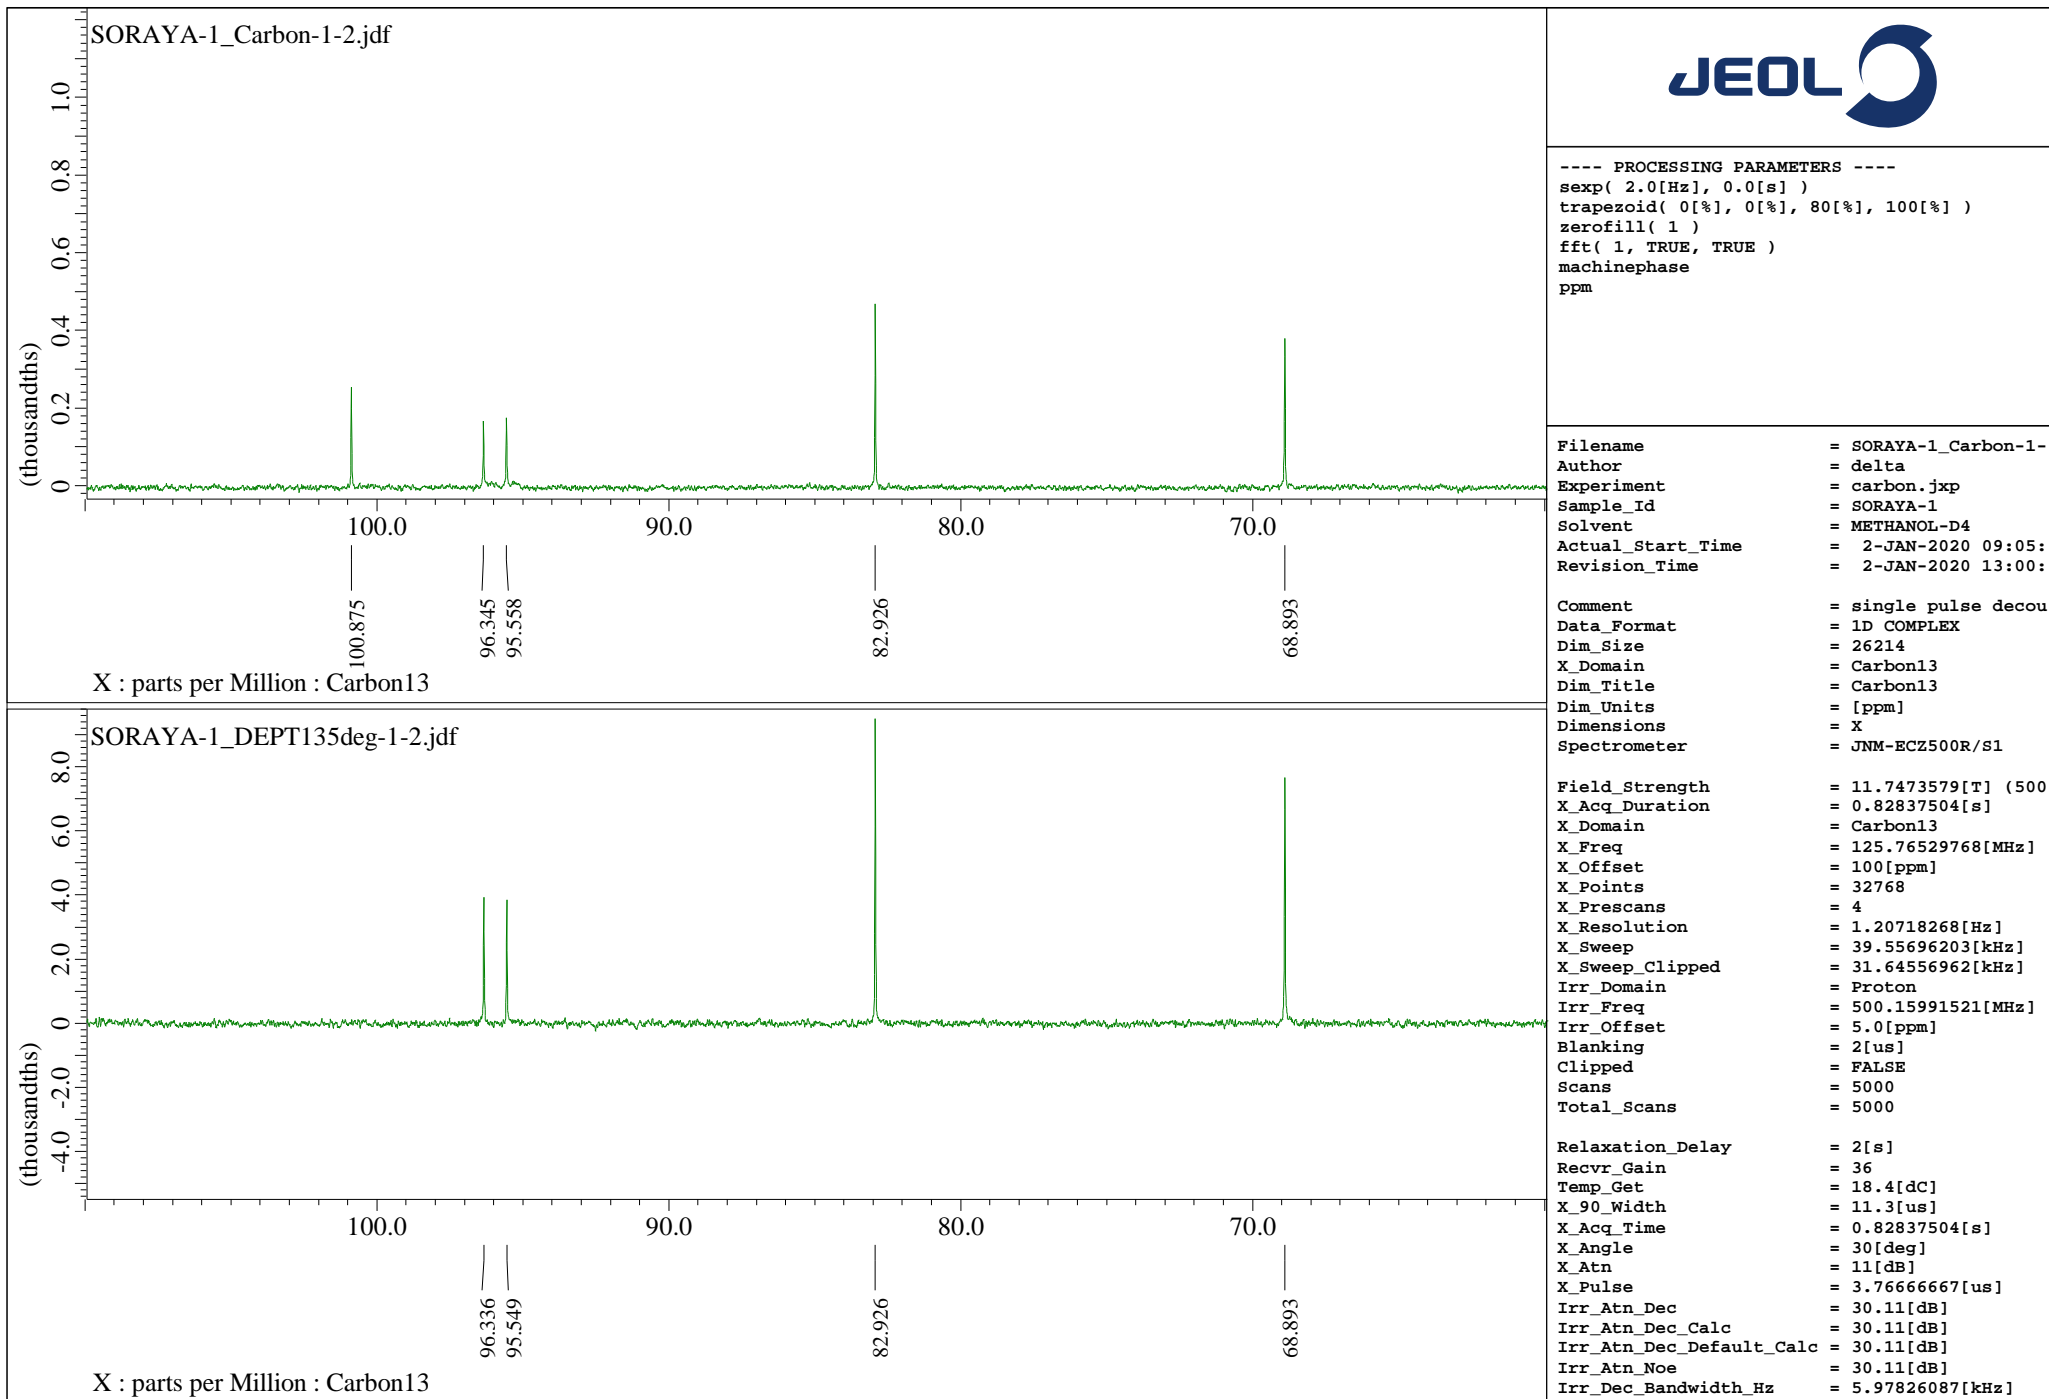

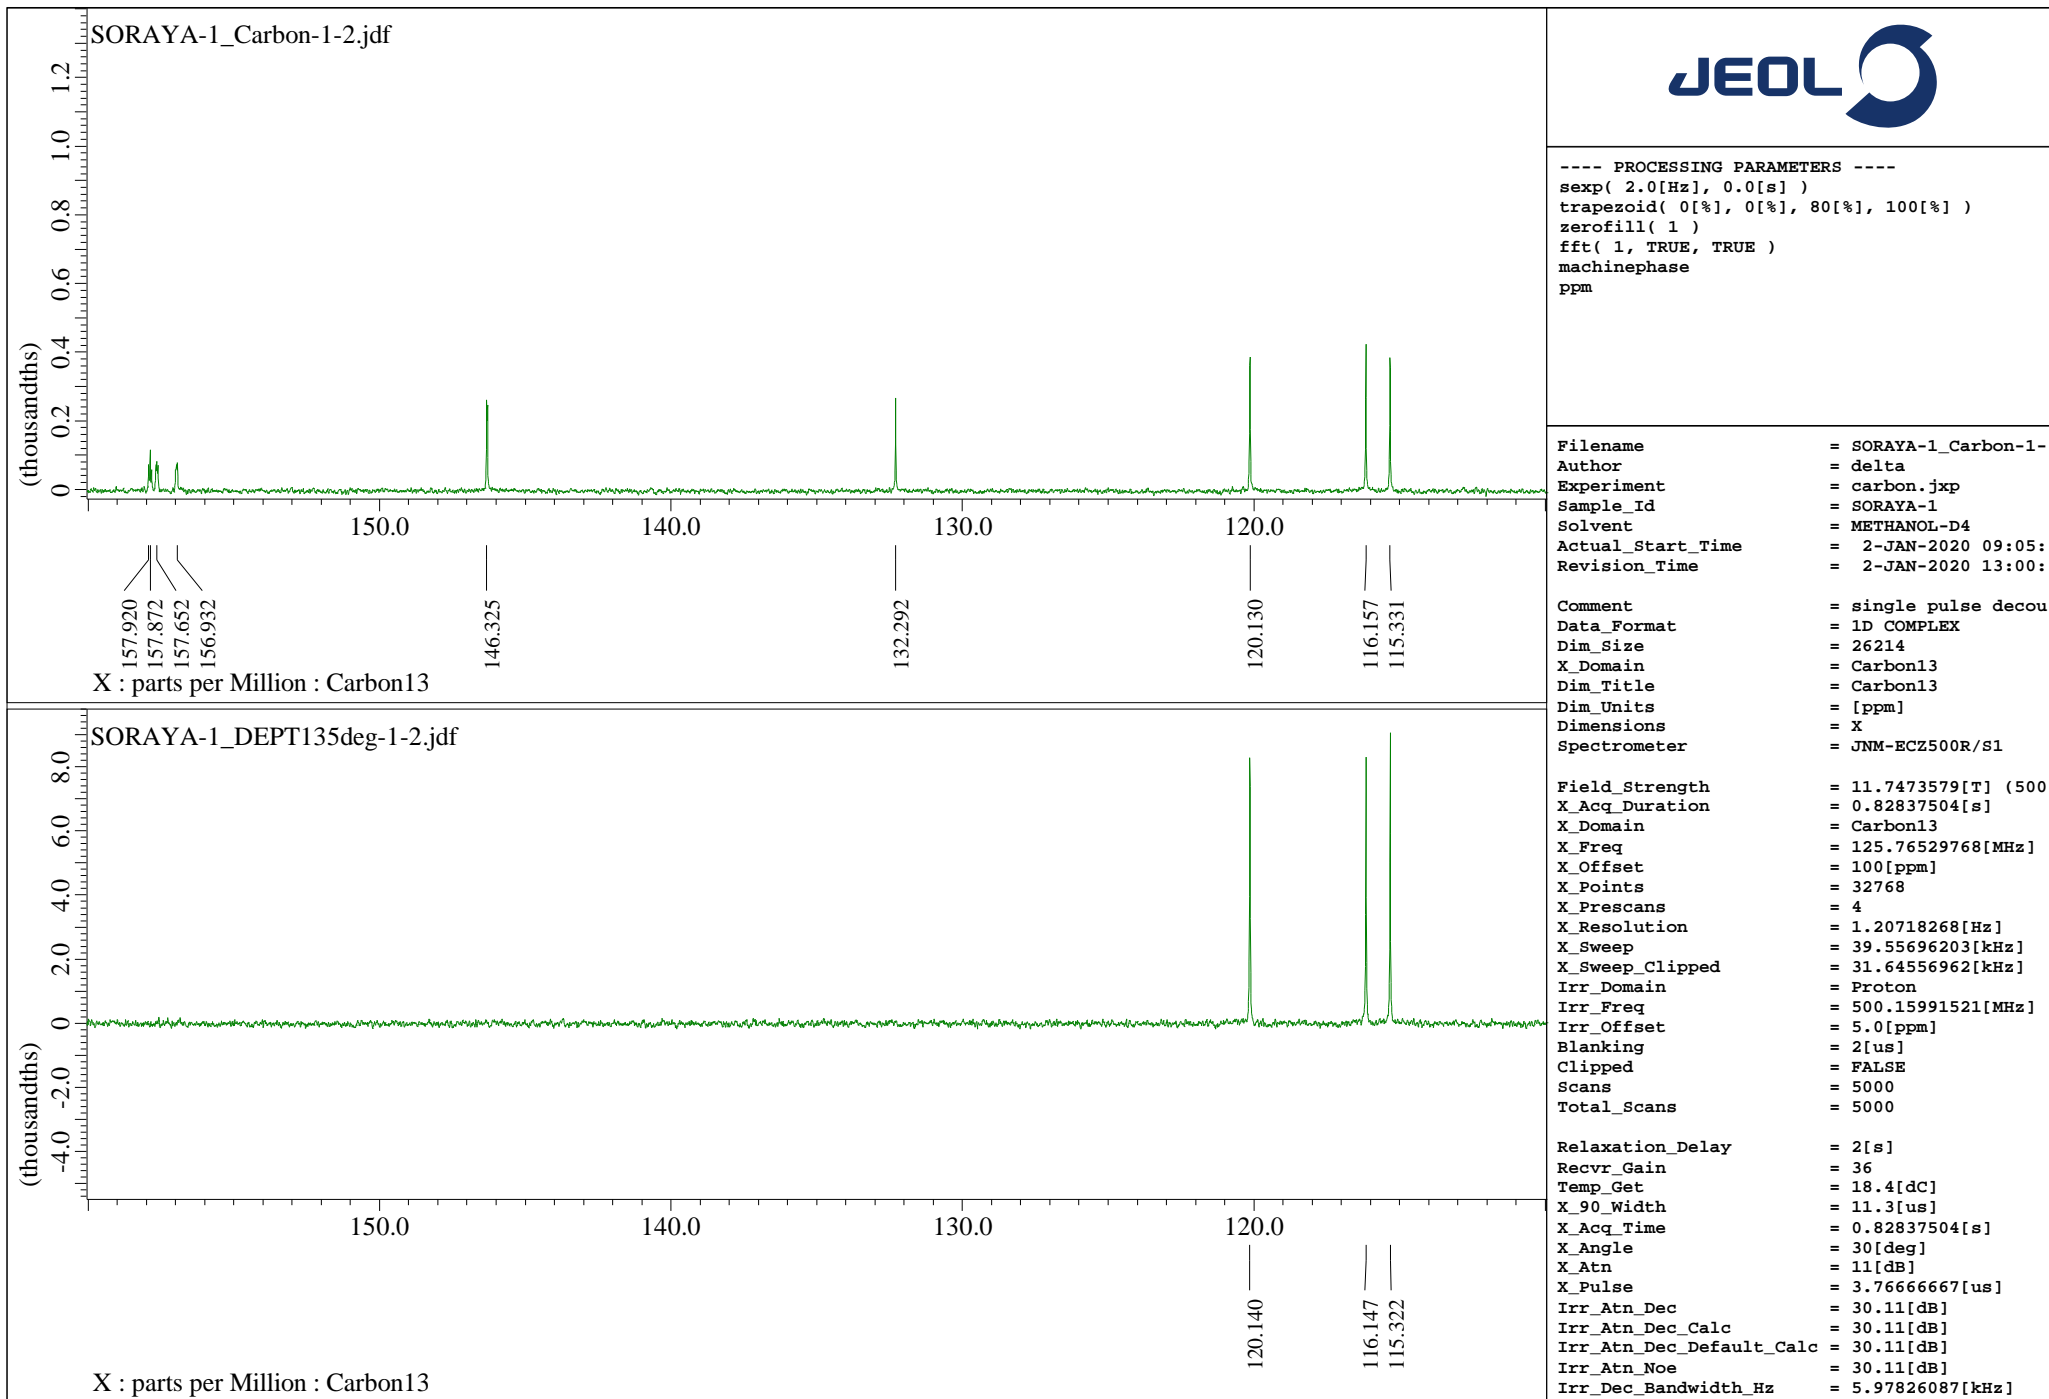

Supplement: s1 [file s1]
